# Supplementary material for: Interleukin-15 response signature predicts RhCMV/SIV vaccine efficacy
Source: PLoS Pathog. 2021 Jul 6;17(7):e1009278. doi: 10.1371/journal.ppat.1009278 (PMC8284654; doi:10.1371/journal.ppat.1009278)
Supplement: S6 Table — Data set shows genes within the validation cohort that were DDE genes from 68–1 oral and subQ cohort RMs that are also IL-15 response genes. Data includes fold-changes, unadjusted p-values, and adjusted p-values for each gene. (XLSX) [file ppat.1009278.s006.xlsx]

## Sheet: ExtDataTable6.Xdde
Ensembl.RM.ID	Ensembl.HS.ID	HS.SYMBOL.ID	logFC.W0D1.Prot	logFC.W0D3.Prot	logFC.W0D7.Prot	logFC.W18D0.Prot	logFC.W18D1.Prot	logFC.W18D3.Prot	logFC.W18D7.Prot	logFC.W88D0.Prot	logFC.W0D1.Unpr	logFC.W0D3.Unpr	logFC.W0D7.Unpr	logFC.W18D0.Unpr	logFC.W18D1.Unpr	logFC.W18D3.Unpr	logFC.W18D7.Unpr	logFC.W88D0.Unpr	Pval.W0D1.Prot	Pval.W0D3.Prot	Pval.W0D7.Prot	Pval.W18D0.Prot	Pval.W18D1.Prot	Pval.W18D3.Prot	Pval.W18D7.Prot	Pval.W88D0.Prot	Pval.W0D1.Unpr	Pval.W0D3.Unpr	Pval.W0D7.Unpr	Pval.W18D0.Unpr	Pval.W18D1.Unpr	Pval.W18D3.Unpr	Pval.W18D7.Unpr	Pval.W88D0.Unpr	adjPval.W0D1.Prot	adjPval.W0D3.Prot	adjPval.W0D7.Prot	adjPval.W18D0.Prot	adjPval.W18D1.Prot	adjPval.W18D3.Prot	adjPval.W18D7.Prot	adjPval.W88D0.Prot	adjPval.W0D1.Unpr	adjPval.W0D3.Unpr	adjPval.W0D7.Unpr	adjPval.W18D0.Unpr	adjPval.W18D1.Unpr	adjPval.W18D3.Unpr	adjPval.W18D7.Unpr
ENSMMUG00000038018	ENSG00000180628	PCGF5	0.7291	1.629	0.7002	0.6135	1.81	2.003	-0.06869	0.7334	0.2993	0.8495	-0.1752	-0.3228	-0.0364	0.6673	-0.7748	-0.1064	0.06733	1.948e-05	0.05564	0.1143	5.461e-05	1.241e-07	0.863	0.04468	0.2877	0.004716	0.5404	0.2805	0.9082	0.02402	0.01011	0.7163	0.4444	0.002028	0.2336	0.315	0.004348	1.292e-05	0.9999	0.1099	0.4462	0.1401	0.8897	0.5259	0.9552	0.1596	0.1117
ENSMMUG00000020612	ENSG00000175073	VCPIP1	0.254	1.272	0.5764	0.5344	1.454	1.814	-0.2273	0.6621	-0.1366	0.6053	-0.2607	-0.3036	-0.1647	0.5727	-0.7705	0.06106	0.5278	0.0009788	0.1142	0.1652	0.001337	3.221e-06	0.5607	0.06976	0.6363	0.05473	0.3701	0.3122	0.6145	0.0726	0.01018	0.8379	0.9118	0.03791	0.3222	0.386	0.0407	0.0001126	0.9999	0.1524	0.757	0.5434	0.8491	0.5569	0.7913	0.2846	0.1121
ENSMMUG00000014558	ENSG00000096968	JAK2	0.5366	1.377	0.7834	0.7617	1.375	1.951	-0.1746	0.9855	0.02276	0.6125	-0.2211	-0.2781	-0.2231	0.438	-0.7398	0.1738	0.1989	0.0007294	0.03923	0.05684	0.003418	2.222e-06	0.6605	0.01027	0.9395	0.0648	0.4622	0.3704	0.5115	0.1933	0.01611	0.5774	0.6878	0.03118	0.2069	0.2108	0.07651	8.732e-05	0.9999	0.03884	0.9653	0.5801	0.8733	0.6105	0.7182	0.463	0.1373
ENSMMUG00000055568	ENSG00000127951	FGL2	0.1094	0.9138	0.5376	0.6412	0.8966	1.487	-0.2523	0.7753	-0.03183	0.4455	-0.1273	-0.04589	-0.3021	0.4252	-0.7268	0.2829	0.762	0.008323	0.1021	0.06464	0.02614	1.856e-05	0.4564	0.01977	0.9026	0.1163	0.6228	0.8641	0.3033	0.1353	0.005416	0.2958	0.9727	0.1274	0.3053	0.2287	0.2349	0.0003589	0.9999	0.06179	0.9431	0.6929	0.911	0.9398	0.538	0.3904	0.08536
ENSMMUG00000013460	ENSG00000166128	RAB8B	0.08793	0.9703	0.5811	0.4344	0.9986	1.423	-0.04294	0.8718	-0.2388	0.459	-0.2087	-0.3265	-0.2305	0.4486	-0.5336	-0.02936	0.7976	0.002503	0.0611	0.1883	0.00799	8.854e-06	0.8972	0.005133	0.3251	0.07589	0.3894	0.1977	0.3978	0.08214	0.03247	0.9053	0.978	0.07187	0.2428	0.4183	0.1271	0.0002207	0.9999	0.0243	0.4841	0.6126	0.8562	0.4305	0.6242	0.3008	0.1792
ENSMMUG00000023248	ENSG00000211455	STK38L	-0.1144	0.7813	0.5764	0.4893	0.8898	1.327	-0.2961	0.6642	-0.3319	0.2956	-0.07202	-0.1482	-0.262	0.4214	-0.5436	0.2052	0.7741	0.03248	0.1043	0.1961	0.03969	0.0002189	0.4405	0.05965	0.2433	0.3191	0.797	0.6121	0.4088	0.1513	0.06098	0.4706	0.9758	0.2048	0.3087	0.4281	0.2726	0.001928	0.9999	0.1356	0.3992	0.8126	0.9582	0.7972	0.6331	0.4125	0.237
ENSMMUG00000002025	ENSG00000028116	VRK2	0.4495	1.001	0.4871	0.4958	1.095	1.218	-0.1428	0.6751	-0.007057	0.4477	-0.2045	-0.2889	-0.3052	0.2361	-0.6339	0.03851	0.1444	0.0005704	0.08139	0.09682	0.001414	2.057e-05	0.6333	0.01547	0.9746	0.05912	0.3632	0.2167	0.2309	0.3118	0.006663	0.8656	0.6173	0.02663	0.2748	0.2871	0.0417	0.0003855	0.9999	0.05192	0.9851	0.5603	0.8481	0.4528	0.4649	0.5885	0.09389
ENSMMUG00000000170	ENSG00000205413	SAMD9	0.784	2.032	1.164	1.223	2.221	2.416	-0.2224	1.673	0.2593	1.41	-0.3496	-0.2072	0.01317	0.8225	-1.188	0.6699	0.1374	0.0001532	0.01463	0.01489	0.0002967	4.375e-06	0.6533	0.0008179	0.5016	0.001587	0.3608	0.5987	0.976	0.0621	0.002313	0.1038	0.6034	0.01031	0.1539	0.09769	0.01434	0.0001384	0.9999	0.006928	0.6482	0.0651	0.8473	0.789	0.9893	0.2619	0.05983
ENSMMUG00000014090	ENSG00000153922	CHD1	0.04903	1.087	0.6941	0.735	1.359	1.528	-0.08603	1.193	-0.3283	0.4985	-0.2223	-0.197	-0.2688	0.2496	-0.65	0.4311	0.9028	0.004427	0.05734	0.05631	0.00256	5.579e-05	0.8239	0.00134	0.257	0.1107	0.4428	0.5094	0.4099	0.4236	0.02803	0.1503	0.9898	0.09864	0.2369	0.2095	0.06277	0.0007733	0.9999	0.00961	0.4142	0.6865	0.8674	0.7259	0.6342	0.6854	0.1696
ENSMMUG00000001680	ENSG00000136560	TANK	0.4633	0.9716	0.5699	0.6629	1.221	1.11	-0.04425	0.7047	0.06104	0.6502	-0.08963	-0.1242	-0.07194	0.1913	-0.4178	0.1234	0.06655	6.873e-05	0.01309	0.006507	2.362e-05	4.036e-06	0.854	0.002365	0.7342	0.001122	0.6193	0.5046	0.723	0.3247	0.02319	0.5064	0.4423	0.005574	0.1494	0.05952	0.002214	0.0001315	0.9999	0.01428	0.8311	0.05039	0.9105	0.7225	0.8587	0.5984	0.1586
ENSMMUG00000058073	ENSG00000198604	BAZ1A	0.3448	1.098	0.7209	0.7177	1.314	1.696	0.04062	1.222	0.05314	0.6428	-0.2432	-0.1637	-0.01723	0.5404	-0.5366	0.539	0.3215	0.0009946	0.02329	0.03218	0.0008068	5.998e-07	0.9029	0.0001824	0.831	0.01885	0.3325	0.5265	0.9512	0.05036	0.03494	0.03966	0.8074	0.03798	0.1735	0.1517	0.02857	3.672e-05	0.9999	0.002511	0.8966	0.33	0.837	0.7394	0.9775	0.2322	0.1851
ENSMMUG00000015324	ENSG00000065613	SLK	0.3162	0.884	0.6295	0.86	0.9353	1.775	0.0599	1.17	0.0309	0.3613	-0.09575	0.06213	-0.1275	0.6766	-0.3991	0.7253	0.3584	0.006995	0.04461	0.01	0.01483	2.191e-07	0.8548	0.0003104	0.9006	0.177	0.7	0.8081	0.6491	0.01477	0.1118	0.005922	0.8332	0.1194	0.2155	0.07696	0.1803	1.854e-05	0.9999	0.003544	0.942	0.7569	0.9326	0.9147	0.814	0.1232	0.3132
ENSMMUG00000004188	ENSG00000068366	ACSL4	-0.2237	0.8138	0.5565	0.9077	0.953	1.832	-0.07397	1.04	-0.224	0.3601	-0.04834	0.212	-0.0436	0.8311	-0.4931	0.3827	0.5935	0.03439	0.1356	0.02191	0.03414	2.346e-06	0.8533	0.005394	0.4483	0.247	0.8684	0.479	0.8947	0.007992	0.1013	0.1983	0.9308	0.2071	0.3496	0.1215	0.2588	8.988e-05	0.9999	0.02503	0.6013	0.7917	0.9734	0.7037	0.9482	0.08925	0.2997
ENSMMUG00000031279	ENSG00000169905	TOR1AIP2	-0.2892	0.3551	0.3188	0.5575	0.8391	1.059	0.02879	0.6178	-0.3848	0.149	-0.3557	-0.1454	-0.1781	0.3501	-0.4927	-0.05849	0.3741	0.2256	0.269	0.06782	0.01466	0.0002217	0.9264	0.03055	0.09093	0.5283	0.1161	0.5274	0.4741	0.1288	0.03262	0.7945	0.8451	0.4106	0.497	0.2351	0.1793	0.001938	0.9999	0.08415	0.2077	0.8915	0.7756	0.7401	0.6915	0.3811	0.1797
ENSMMUG00000032353	ENSG00000101966	XIAP	0.368	0.9776	0.7495	0.8642	1.146	1.953	-0.1026	1.114	0.0361	0.5474	-0.02913	-0.09464	0.07103	0.6536	-0.3622	0.01825	0.406	0.01659	0.06359	0.0444	0.01553	1.243e-06	0.8201	0.005642	0.9046	0.08057	0.9235	0.7642	0.8308	0.02984	0.2553	0.9518	0.8568	0.169	0.2463	0.1819	0.1857	5.693e-05	0.9999	0.0258	0.9446	0.6251	0.9842	0.8882	0.9182	0.1778	0.4845
ENSMMUG00000005314	ENSG00000118985	ELL2	-0.1146	0.4724	0.29	0.5252	0.3871	1.091	-0.1374	0.4731	-0.3615	-0.003938	-0.1618	-0.1034	-0.1957	0.1583	-0.4138	0.05738	0.6573	0.04892	0.2086	0.03336	0.1664	4.864e-06	0.5778	0.03986	0.05106	0.9838	0.3765	0.5822	0.3417	0.4037	0.0273	0.757	0.9523	0.2266	0.4342	0.1546	0.4406	0.0001482	0.9999	0.1013	0.143	0.9972	0.8513	0.7778	0.574	0.6699	0.1682
ENSMMUG00000014518	ENSG00000164823	OSGIN2	0.1135	0.6629	0.3204	0.2452	0.8126	0.9765	-0.1293	0.4736	-0.1017	0.3053	-0.1752	-0.3651	-0.1874	0.1451	-0.417	0.06777	0.6289	0.002802	0.1325	0.2792	0.001826	8.996e-06	0.569	0.0262	0.5467	0.09049	0.3026	0.04091	0.3235	0.411	0.01664	0.6938	0.943	0.07812	0.345	0.5211	0.04977	0.0002228	0.9999	0.07558	0.6861	0.6432	0.8289	0.1869	0.5569	0.6763	0.1392
ENSMMUG00000000955	ENSG00000135655	USP15	0.09728	0.7183	0.6211	0.5934	0.83	1.032	-0.1206	0.6855	-0.4201	0.2729	-0.2013	-0.1624	-0.4853	0.005663	-0.6739	0.1118	0.7989	0.05207	0.07877	0.108	0.05227	0.004384	0.7349	0.05423	0.1305	0.3702	0.4688	0.5707	0.1225	0.9852	0.0146	0.7007	0.978	0.2315	0.2711	0.3054	0.3024	0.01606	0.9999	0.1263	0.2634	0.8326	0.875	0.7702	0.3314	0.9946	0.1307
ENSMMUG00000005391	ENSG00000119729	RHOQ	0.1142	0.5281	0.5494	0.3743	0.5168	0.6138	-0.0504	0.4639	-0.1437	0.04101	0.003888	-0.198	-0.2797	0.149	-0.4223	0.09595	0.6263	0.01659	0.009839	0.09767	0.04577	0.003959	0.824	0.02847	0.3934	0.8188	0.9815	0.2588	0.1444	0.4036	0.01548	0.5766	0.9426	0.169	0.1383	0.2884	0.2868	0.01485	0.9999	0.07999	0.5494	0.9632	0.9969	0.5031	0.3633	0.6699	0.1348
ENSMMUG00000002533	ENSG00000083535	PIBF1	0.1603	0.534	0.4012	0.1764	0.5069	1.042	-0.07998	0.8363	-0.01114	0.3682	-0.2018	-0.2279	-0.2906	0.292	-0.3863	0.5962	0.5846	0.04971	0.1343	0.5395	0.1166	0.0001035	0.7832	0.001543	0.9585	0.1029	0.3541	0.318	0.2357	0.1869	0.08433	0.006037	0.9289	0.2278	0.3475	0.7439	0.3862	0.001166	0.9999	0.01061	0.9757	0.6756	0.8467	0.5621	0.4704	0.4552	0.2746
ENSMMUG00000007658	ENSG00000183735	TBK1	0.3798	0.9671	0.6977	0.591	0.9965	1.184	0.03122	0.8982	-0.1998	0.495	-0.2117	-0.3133	-0.2658	0.1985	-0.5651	0.1694	0.2866	0.003897	0.03136	0.08548	0.01131	0.0003203	0.9283	0.00569	0.4343	0.07076	0.4085	0.2417	0.3574	0.4635	0.03251	0.5163	0.7806	0.09315	0.1893	0.2672	0.16	0.002501	0.9999	0.02597	0.5882	0.5974	0.8604	0.4834	0.5889	0.711	0.1794
ENSMMUG00000019926	ENSG00000113742	CPEB4	-0.258	0.6035	0.7144	0.843	0.6685	1.512	-0.02422	0.906	-0.5081	-0.2925	-0.07165	-0.09234	-0.6439	0.2912	-0.4559	0.04197	0.4972	0.08669	0.03453	0.0191	0.1059	1.244e-05	0.9465	0.007477	0.05942	0.3038	0.7845	0.7336	0.03477	0.2873	0.09099	0.8749	0.9	0.2704	0.1967	0.1127	0.3758	0.0002748	0.9999	0.03113	0.1571	0.8104	0.9541	0.8697	0.1902	0.5632	0.2848
ENSMMUG00000017206	ENSG00000108061	SHOC2	0.01825	0.568	0.5841	0.4399	0.4091	0.9357	-0.1206	0.5022	-0.3259	-0.101	-0.07164	-0.285	-0.5686	0.08236	-0.5064	-0.06027	0.9508	0.04166	0.03042	0.1208	0.2095	0.0007236	0.6685	0.06211	0.1283	0.6595	0.7366	0.1974	0.01995	0.7226	0.01953	0.7845	0.994	0.2156	0.1881	0.325	0.4814	0.004421	0.9999	0.1396	0.2605	0.9252	0.943	0.4301	0.1494	0.8734	0.1482
ENSMMUG00000005909	ENSG00000164463	CREBRF	-0.1481	1.04	1.186	1.173	1.344	2.102	0.1468	1.673	-0.6438	0.1939	-0.3031	-0.04571	-0.3504	0.6881	-0.8085	0.5159	0.757	0.01796	0.005813	0.009575	0.008998	1.576e-06	0.7496	9.634e-05	0.05859	0.5802	0.3587	0.8929	0.3475	0.04651	0.01918	0.1214	0.9717	0.1728	0.1175	0.07478	0.1379	6.857e-05	0.9999	0.0016	0.1558	0.9029	0.8469	0.9526	0.5792	0.2226	0.147
ENSMMUG00000021526	ENSG00000148154	UGCG	-0.1231	0.9577	0.7615	0.4083	0.7357	1.302	0.2391	0.6331	-0.6167	0.02008	-0.2611	-0.4286	-0.6198	0.01561	-0.648	-0.465	0.7526	0.006951	0.02631	0.2651	0.07855	0.0001703	0.5176	0.06569	0.02666	0.9437	0.3318	0.1315	0.04563	0.9555	0.02049	0.09486	0.9707	0.1194	0.1804	0.5067	0.3457	0.001624	0.9999	0.1457	0.09536	0.989	0.8361	0.3393	0.2144	0.9842	0.151
ENSMMUG00000022643	ENSG00000116747	RO60	0.2772	0.9839	0.4314	0.2537	1.238	1.18	-0.4389	0.5851	-0.04609	0.5843	-0.2378	-0.3636	-0.167	0.3827	-0.6005	-0.06914	0.3627	0.0006002	0.1185	0.3928	0.0002402	2.735e-05	0.1509	0.034	0.8295	0.01079	0.2745	0.1124	0.4878	0.08845	0.008859	0.7529	0.835	0.02749	0.3283	0.6289	0.01204	0.000468	0.9999	0.0906	0.8956	0.2394	0.8207	0.3124	0.7013	0.3116	0.1068
ENSMMUG00000001611	ENSG00000164327	RICTOR	0.1579	1.718	1.278	1.293	2.083	2.657	0.01707	2.104	-0.4947	0.8118	-0.5087	-0.1983	-0.04326	0.9822	-0.9647	0.5125	0.7861	0.001105	0.01433	0.01861	0.0007437	4.316e-07	0.9763	4.995e-05	0.2182	0.04881	0.201	0.6257	0.9212	0.01529	0.0222	0.1903	0.9772	0.04031	0.1539	0.1111	0.02717	3.056e-05	0.9999	0.001018	0.3705	0.5149	0.7922	0.8055	0.9618	0.1248	0.1556
ENSMMUG00000020608	ENSG00000165029	ABCA1	-0.1921	0.6085	0.6529	1.115	1.255	1.843	-0.2346	1.559	-0.269	0.5437	-0.2839	0.3052	0.2329	0.9957	-0.5091	0.961	0.6473	0.1084	0.07871	0.004774	0.004772	1.082e-06	0.5562	2.974e-05	0.3503	0.07486	0.321	0.2943	0.4636	0.0009077	0.08512	0.0009304	0.9491	0.293	0.2711	0.04923	0.09302	5.328e-05	0.9999	0.0007425	0.5098	0.6092	0.8317	0.5387	0.6823	0.02605	0.2761
ENSMMUG00000008126	ENSG00000006459	KDM7A	-0.0403	0.6937	0.5973	0.9298	0.8084	1.551	0.07465	1.234	-0.35	0.1912	-0.07359	-0.01692	-0.1926	0.6078	-0.3622	0.545	0.9026	0.02238	0.04208	0.003117	0.02403	4.582e-07	0.8121	3.955e-05	0.136	0.4374	0.7493	0.9431	0.4606	0.01353	0.1247	0.02122	0.9898	0.1854	0.212	0.03741	0.2256	3.19e-05	0.9999	0.0008761	0.2706	0.8657	0.946	0.976	0.6803	0.1179	0.3307
ENSMMUG00000011095	ENSG00000156273	BACH1	-0.2073	0.4848	0.6551	0.8044	0.4769	1.31	-0.2324	0.7854	-0.4227	-0.2418	-0.05492	0.008289	-0.3503	0.3804	-0.5044	0.2998	0.558	0.1459	0.04488	0.01963	0.2242	0.000152	0.4902	0.0179	0.102	0.3838	0.8321	0.9753	0.2297	0.1918	0.0514	0.2709	0.9227	0.3313	0.2155	0.1146	0.4924	0.00151	0.9999	0.05778	0.2233	0.8392	0.9664	0.9912	0.4636	0.4613	0.2176
ENSMMUG00000009060	ENSG00000082269	FAM135A	-0.04471	1.065	1.054	0.856	1.133	1.585	0.05259	1.587	-0.6424	0.284	-0.4067	-0.197	-0.5568	0.304	-0.8985	0.2977	0.9325	0.02352	0.02316	0.08086	0.04236	0.0004843	0.9182	0.0004916	0.07981	0.4428	0.2526	0.5911	0.1708	0.3977	0.0174	0.392	0.9928	0.1874	0.1735	0.258	0.2801	0.00337	0.9999	0.004834	0.1914	0.8659	0.8124	0.7842	0.3969	0.6649	0.1416
ENSMMUG00000051358	NA	NA	0.3988	1.335	1.088	1.196	1.154	1.886	-0.1943	1.302	-0.2583	0.4359	-0.2096	0.05924	-0.5377	0.3874	-1.197	0.4484	0.4693	0.01016	0.02993	0.02397	0.05743	0.0002481	0.7209	0.009549	0.5136	0.303	0.5965	0.8843	0.2346	0.36	0.004414	0.27	0.888	0.1376	0.1874	0.1281	0.3139	0.002099	0.9999	0.0368	0.6582	0.8104	0.9052	0.9499	0.4694	0.632	0.07782
ENSMMUG00000015814	ENSG00000102081	FMR1	0.3179	1.364	0.8063	0.6619	1.793	1.645	-0.1707	0.897	-0.2125	0.4731	-0.2669	-0.4525	-0.1676	0.3431	-0.7176	-0.06179	0.4382	0.0004655	0.03119	0.09516	9.346e-05	1.837e-05	0.6719	0.01617	0.4644	0.1268	0.3589	0.1384	0.6068	0.2652	0.01797	0.8352	0.8757	0.02363	0.189	0.2849	0.006469	0.0003569	0.9999	0.05361	0.6161	0.7024	0.8469	0.349	0.7855	0.5407	0.143
ENSMMUG00000064421	NA	NA	0.1333	1.146	0.7931	0.567	1.316	1.688	-0.3822	0.8196	-0.6205	0.6204	-0.5832	-0.589	-0.6037	0.1831	-1.111	-0.2092	0.7806	0.008628	0.06696	0.2137	0.01018	9.161e-05	0.4276	0.05534	0.0682	0.07351	0.08408	0.09525	0.1091	0.5891	0.002301	0.5378	0.9764	0.1295	0.2517	0.4504	0.15	0.001082	0.9999	0.1283	0.1726	0.6043	0.7676	0.2864	0.3132	0.7958	0.05977
ENSMMUG00000021246	NA	NA	-0.01647	0.4902	0.592	0.7852	0.6739	0.8707	-0.1806	0.5376	-0.6747	0.1197	-0.08217	-0.03293	-0.5021	-0.06993	-0.6704	0.02383	0.964	0.1412	0.06662	0.02227	0.08817	0.00745	0.6058	0.09534	0.01205	0.6648	0.7508	0.9017	0.09116	0.7987	0.01325	0.9283	0.994	0.3264	0.251	0.1227	0.3542	0.02376	0.9999	0.1901	0.05737	0.9269	0.9463	0.9565	0.2889	0.9122	0.1251
ENSMMUG00000017260	ENSG00000140030	GPR65	-0.3578	0.397	0.5434	0.6429	0.4756	0.9404	-0.4464	0.8697	-0.7848	0.2778	-0.3029	-0.1037	-0.7575	-0.1352	-0.963	0.269	0.458	0.3725	0.2073	0.1584	0.3676	0.0305	0.3376	0.04533	0.02696	0.4542	0.383	0.7712	0.05727	0.7148	0.007671	0.4506	0.8831	0.5462	0.433	0.378	0.6106	0.06824	0.9999	0.1111	0.09604	0.8699	0.8553	0.8929	0.2344	0.8687	0.1003
ENSMMUG00000023600	ENSG00000136021	SCYL2	-0.1288	0.2893	0.4203	0.2567	0.3269	0.711	-0.004964	0.6275	-0.2913	-0.1503	-0.009246	-0.1771	-0.4438	0.1393	-0.284	0.1931	0.5985	0.2049	0.05769	0.2714	0.2237	0.001586	0.983	0.005018	0.09914	0.4243	0.9578	0.3298	0.02704	0.4573	0.1088	0.2847	0.933	0.3899	0.2374	0.5129	0.4921	0.007799	0.9999	0.02392	0.2193	0.861	0.9926	0.5723	0.1693	0.7068	0.3089
ENSMMUG00000052506	ENSG00000205659	LIN52	0.1456	0.4846	0.3505	0.2729	0.556	0.9204	0.03884	0.6418	-0.3648	0.03314	-0.1726	-0.2433	-0.2419	0.04763	-0.3617	-0.00463	0.4594	0.008488	0.04737	0.1475	0.01051	6.247e-07	0.8383	0.0003576	0.01147	0.8243	0.2238	0.1013	0.1296	0.746	0.01332	0.9741	0.8833	0.1288	0.2186	0.3636	0.1526	3.786e-05	0.9999	0.003869	0.05552	0.9644	0.7946	0.296	0.3421	0.8864	0.1256
ENSMMUG00000051397	ENSG00000188215	DCUN1D3	-0.3217	0.1326	0.1925	0.1065	0.5589	0.8664	-0.04122	0.3688	-0.412	0.1756	-0.08715	-0.03687	-0.03233	0.08218	-0.2946	-0.03099	0.2564	0.6021	0.4349	0.6861	0.06006	0.0004634	0.8795	0.1335	0.03779	0.3885	0.6503	0.8535	0.8793	0.6738	0.1355	0.8729	0.752	0.7373	0.6414	0.8392	0.3181	0.003271	0.9999	0.2427	0.1175	0.8408	0.9172	0.9357	0.941	0.8451	0.3456
ENSMMUG00000021218	ENSG00000082074	FYB1	0.1187	0.6314	0.4703	0.6837	0.871	1.398	-0.05204	1.08	0.005416	0.2001	0.03079	0.1018	0.1095	0.6547	-0.1835	0.715	0.6022	0.004171	0.02518	0.002226	0.0009785	4.534e-09	0.8079	2.29e-06	0.9739	0.2688	0.8525	0.5531	0.5614	0.0007307	0.2637	0.000125	0.9354	0.09624	0.1788	0.03044	0.03321	2.027e-06	0.9999	0.0001245	0.985	0.8008	0.9712	0.7582	0.7534	0.023	0.4919
ENSMMUG00000008801	ENSG00000135049	AGTPBP1	-0.3117	0.3559	0.2906	0.6365	0.59	0.9913	-0.02053	0.6253	-0.3548	0.005509	0.04577	0.04823	-0.2466	0.2507	-0.2275	0.3958	0.3329	0.2321	0.3114	0.03763	0.09477	0.0007882	0.9462	0.031	0.1264	0.9821	0.8416	0.8382	0.3423	0.3081	0.3256	0.09505	0.8167	0.4169	0.5362	0.1655	0.3609	0.0047	0.9999	0.08495	0.2577	0.9968	0.97	0.9282	0.5745	0.5849	0.5539
ENSMMUG00000000754	ENSG00000104093	DMXL2	-0.0359	0.7902	0.8248	1.319	1.15	2.025	0.05116	1.666	-0.215	0.3929	-0.05748	0.2609	0.01105	0.9111	-0.4204	0.9491	0.9378	0.05996	0.0443	0.002702	0.02101	2.02e-06	0.9074	6.52e-05	0.5141	0.2617	0.8606	0.4359	0.9761	0.00876	0.2092	0.004931	0.9928	0.2382	0.2154	0.03417	0.2129	8.149e-05	0.9999	0.00123	0.6585	0.7958	0.9722	0.6686	0.9893	0.09403	0.4312
ENSMMUG00000005461	ENSG00000101596	SMCHD1	0.521	1.405	0.9336	0.9815	1.654	1.979	-0.04197	1.261	0.0331	0.6838	-0.1513	-0.05703	0.006894	0.7074	-0.6014	0.5025	0.1462	8.092e-05	0.004391	0.0044	8.474e-05	4.291e-08	0.8978	0.0002081	0.899	0.01893	0.5597	0.8314	0.9814	0.01626	0.01917	0.06948	0.62	0.006263	0.1079	0.04618	0.00604	6.873e-06	0.9999	0.002747	0.9413	0.3309	0.8943	0.9252	0.9913	0.1288	0.147
ENSMMUG00000016823	ENSG00000145012	LPP	0.3767	0.6734	0.5128	1.116	0.6351	1.43	-0.3235	0.9547	0.05406	0.1963	0.09109	0.4256	-0.1115	0.6589	-0.4063	0.4386	0.1858	0.01186	0.04679	6.445e-05	0.04399	1.089e-07	0.2591	0.0002531	0.7945	0.3778	0.6621	0.04633	0.6403	0.002583	0.06454	0.03788	0.6719	0.1478	0.2178	0.004267	0.2826	1.205e-05	0.9999	0.003146	0.873	0.8369	0.9204	0.1998	0.8083	0.04621	0.2415
ENSMMUG00000020560	ENSG00000123684	LPGAT1	-0.03849	0.4876	0.574	1.203	0.4598	1.179	-0.0461	0.7703	-0.2933	0.1118	0.01281	0.4459	-0.2229	0.477	-0.4714	0.2856	0.9022	0.09024	0.03928	6.301e-05	0.1766	3.449e-05	0.8771	0.005751	0.1904	0.6371	0.9536	0.04886	0.3792	0.04102	0.03868	0.2039	0.9898	0.275	0.2069	0.004237	0.4513	0.0005471	0.9999	0.02617	0.3394	0.9198	0.9918	0.2053	0.6089	0.2077	0.1926
ENSMMUG00000010427	ENSG00000196233	LCOR	-0.0614	0.1462	0.1609	0.7784	0.4683	1	-0.2083	0.7894	-0.1391	0.1339	-0.1007	0.2838	-0.1052	0.6735	-0.2441	0.4379	0.8345	0.5907	0.5404	0.00503	0.1385	0.0001358	0.4635	0.00248	0.5048	0.5498	0.6301	0.1791	0.658	0.001958	0.2511	0.0361	0.9825	0.7272	0.7201	0.05086	0.4127	0.001386	0.9999	0.01475	0.6507	0.8983	0.9122	0.4067	0.82	0.03989	0.4797
ENSMMUG00000003961	ENSG00000142166	IFNAR1	0.02033	0.5613	0.309	0.6411	0.6098	0.9227	-0.1423	0.4251	0.002975	0.05425	0.1288	0.1624	-0.04024	0.3194	-0.2818	0.2169	0.9353	0.01826	0.1737	0.008416	0.02871	0.0001088	0.551	0.0633	0.9869	0.7804	0.4769	0.3854	0.8436	0.1055	0.1224	0.2479	0.9928	0.1736	0.3937	0.06937	0.2432	0.001202	0.9999	0.1416	0.992	0.9538	0.8756	0.6252	0.9239	0.3428	0.3277
ENSMMUG00000008431	NA	NA	-0.2359	0.3055	0.15	0.5537	0.4499	0.78	-0.1587	0.4459	-0.1981	0.08641	0.004535	0.09441	-0.2367	0.229	-0.2985	0.2689	0.3848	0.2289	0.5397	0.03415	0.1326	0.001972	0.5389	0.07094	0.3117	0.681	0.9815	0.64	0.2848	0.2786	0.1299	0.1841	0.8524	0.4138	0.7198	0.1565	0.4056	0.009052	0.9999	0.1544	0.4706	0.9303	0.9969	0.8147	0.5211	0.5554	0.3378
ENSMMUG00000008666	ENSG00000051382	PIK3CB	-0.2781	0.213	0.1715	0.5832	0.4708	1	-0.04034	0.7015	-0.1471	-0.02678	0.06249	0.2735	0.1025	0.5636	-0.009357	0.5681	0.3035	0.3921	0.4736	0.02279	0.106	5.419e-05	0.8742	0.00384	0.4493	0.8975	0.7462	0.1689	0.637	0.00666	0.9615	0.004503	0.794	0.5633	0.6726	0.1244	0.3758	0.0007597	0.9999	0.01986	0.602	0.9796	0.9453	0.3928	0.8063	0.07982	0.9822
ENSMMUG00000001508	ENSG00000163635	ATXN7	-0.15	0.8916	0.3127	0.6661	1.443	2.018	0.05743	1.372	-0.08762	0.6989	-0.3285	0.06205	0.2361	0.8462	-0.4946	0.5918	0.6886	0.00903	0.3537	0.06074	0.000353	9.007e-09	0.8749	5.154e-05	0.7332	0.01064	0.2077	0.8144	0.4049	0.001515	0.06312	0.02191	0.9584	0.1311	0.5755	0.2198	0.01617	2.35e-06	0.9999	0.001041	0.8308	0.2365	0.7924	0.9167	0.6302	0.03494	0.24
ENSMMUG00000014076	ENSG00000172493	AFF1	0.1446	0.7742	0.3862	0.9442	1.365	2.251	-0.3196	1.584	0.1483	0.7983	-0.1523	0.3881	0.4332	1.333	-0.2522	1.184	0.7007	0.02513	0.2594	0.008721	0.0007843	4.091e-10	0.3908	4.298e-06	0.5727	0.004765	0.5678	0.1508	0.1384	2.289e-06	0.356	1.405e-05	0.9617	0.1914	0.488	0.07093	0.0281	8.307e-07	0.9999	0.0001999	0.7081	0.1412	0.8979	0.3668	0.3546	0.001593	0.5843
ENSMMUG00000011819	ENSG00000131873	CHSY1	0.1599	0.9339	0.4484	0.7327	1.406	1.669	-0.2188	1.014	0.1533	0.6979	-0.009755	0.03464	0.3738	0.7802	-0.3667	0.4613	0.6065	0.001477	0.1136	0.01555	4.748e-05	2.782e-08	0.4727	0.0004063	0.4906	0.003619	0.9652	0.8805	0.1317	0.001056	0.1104	0.04237	0.9366	0.0493	0.3214	0.09955	0.003935	5.38e-06	0.9999	0.004215	0.6384	0.1176	0.9932	0.948	0.345	0.02859	0.3112
ENSMMUG00000005861	ENSG00000149177	PTPRJ	-0.3518	0.2384	0.1698	0.5616	0.6515	1.29	0.01425	0.9506	-0.1494	0.2198	-0.08103	0.1853	0.36	0.6005	0.02761	0.4337	0.2317	0.3787	0.5173	0.04431	0.04182	3.627e-06	0.9589	0.0004315	0.4688	0.3216	0.695	0.3837	0.1241	0.009442	0.8935	0.0453	0.7268	0.5517	0.7032	0.1817	0.2787	0.0001217	0.9999	0.004378	0.6197	0.8129	0.9312	0.6236	0.3343	0.09684	0.9494
ENSMMUG00000056768	ENSG00000123700	KCNJ2	-0.1006	0.9687	1.009	1.276	1.265	2.003	-0.1655	1.084	-0.2297	0.56	0.2432	0.4832	-0.1839	0.8142	-0.6506	0.6062	0.8337	0.03205	0.02109	0.005797	0.01686	1.585e-05	0.7171	0.01362	0.5054	0.1326	0.4817	0.1767	0.637	0.03425	0.06482	0.09309	0.9824	0.2042	0.1705	0.05532	0.1943	0.0003229	0.9999	0.04731	0.6512	0.7123	0.8766	0.4031	0.8063	0.1906	0.242
ENSMMUG00000023335	ENSG00000082996	RNF13	0.2309	0.9063	0.7249	1.073	1.12	1.379	-0.164	0.8175	-0.07443	0.2932	0.06303	0.2339	-0.1322	0.4072	-0.5403	0.3347	0.4699	0.003619	0.01453	0.0007541	0.002284	1.31e-05	0.5835	0.006573	0.7459	0.2457	0.7848	0.3313	0.6115	0.1173	0.01876	0.1692	0.8881	0.08943	0.1539	0.01512	0.05839	0.000283	0.9999	0.02848	0.8402	0.7917	0.9541	0.5732	0.7886	0.3618	0.1464
ENSMMUG00000015857	ENSG00000188906	LRRK2	0.2704	1.074	0.9331	1.341	1.445	1.883	-0.1355	1.393	-0.1945	0.5443	-0.07435	0.0826	-0.1551	0.6311	-0.6987	0.6362	0.5107	0.00802	0.01481	0.001096	0.002467	5.644e-06	0.7249	0.0005113	0.516	0.1035	0.8052	0.7924	0.6488	0.06618	0.01933	0.05067	0.9047	0.1254	0.1539	0.01932	0.06134	0.0001641	0.9999	0.004944	0.6597	0.6761	0.9598	0.9053	0.8138	0.2708	0.1474
ENSMMUG00000019177	ENSG00000115339	GALNT3	0.1063	0.8546	0.5678	0.9423	1.241	1.189	-0.1313	0.8709	0.006296	0.305	0.1363	0.1816	0.016	0.3931	-0.4982	0.5325	0.7823	0.01686	0.09861	0.01052	0.003416	0.0006397	0.7245	0.01141	0.9817	0.2984	0.6197	0.5209	0.9585	0.1741	0.08052	0.05772	0.9768	0.1703	0.3002	0.07902	0.07651	0.004065	0.9999	0.04181	0.9896	0.8104	0.9105	0.7348	0.981	0.4378	0.2685
ENSMMUG00000006701	ENSG00000186088	GSAP	-0.2982	0.5247	0.4363	0.791	0.7017	0.9103	-0.108	0.6894	-0.5708	0.08897	-0.1364	-0.1105	-0.1192	0.1209	-0.3766	0.2431	0.3967	0.1065	0.1644	0.01808	0.0672	0.00439	0.7454	0.02913	0.02574	0.7405	0.5864	0.6687	0.6731	0.6518	0.1379	0.3463	0.8552	0.2912	0.3833	0.109	0.328	0.01607	0.9999	0.08147	0.0935	0.9467	0.9017	0.8321	0.829	0.8312	0.3479
ENSMMUG00000003401	ENSG00000083223	TUT7	0.3589	0.9268	0.8875	1.497	1.377	1.785	0.02111	1.404	0.006057	0.3314	0.07218	0.4707	0.08946	0.7201	-0.439	0.8345	0.3408	0.009949	0.01051	7.182e-05	0.001312	1.211e-06	0.9525	8.821e-05	0.9821	0.259	0.7895	0.09685	0.7704	0.01633	0.1032	0.003924	0.8232	0.1362	0.1416	0.00451	0.04053	5.577e-05	0.9999	0.001505	0.9898	0.7941	0.9555	0.2888	0.8876	0.1288	0.3022
ENSMMUG00000018237	ENSG00000136040	PLXNC1	-0.2049	0.478	0.5718	1.194	0.784	1.481	-0.04763	1.109	-0.2204	0.1691	0.0993	0.3167	0.04689	0.7086	-0.3057	0.6666	0.5309	0.1288	0.06178	0.0003458	0.03582	8.139e-06	0.8784	0.0005635	0.3526	0.5117	0.6784	0.2082	0.8616	0.009979	0.1969	0.01059	0.9124	0.3147	0.2439	0.009843	0.262	0.0002096	0.9999	0.005266	0.5118	0.8877	0.9266	0.4431	0.9325	0.1003	0.4179
ENSMMUG00000013625	ENSG00000068650	ATP11A	-0.6937	0.1227	0.3346	1.122	0.4536	1.229	-0.0862	0.9883	-0.3971	0.04412	-0.04486	0.4764	0.1924	0.5815	-0.2831	0.6379	0.0401	0.6853	0.2524	0.0003761	0.1971	3.679e-05	0.7824	0.0007707	0.09849	0.8615	0.8483	0.04646	0.4673	0.01795	0.2346	0.007532	0.353	0.7996	0.4805	0.01028	0.4697	0.0005725	0.9999	0.00665	0.2184	0.9734	0.9709	0.2001	0.6857	0.1348	0.46
ENSMMUG00000016149	ENSG00000170571	EMB	-0.3566	0.7404	0.3902	0.6051	0.8301	1.309	-0.1234	0.3763	-0.5086	0.1343	0.04488	-0.005559	-0.1766	0.5023	-0.4184	0.1345	0.2992	0.02845	0.2249	0.07285	0.0351	0.0001309	0.7065	0.2431	0.04237	0.6232	0.8584	0.983	0.5307	0.07677	0.09385	0.6089	0.7916	0.1978	0.4512	0.244	0.2608	0.001344	0.9999	0.3738	0.1267	0.9142	0.9722	0.9947	0.7327	0.2911	0.2892
ENSMMUG00000003572	ENSG00000105835	NAMPT	-0.09659	0.6382	0.6871	1.283	0.812	1.324	-0.363	1.167	-0.5105	0.2895	-0.1158	0.2862	-0.3685	0.3762	-0.6156	0.5025	0.8263	0.135	0.0943	0.004185	0.1028	0.002041	0.3813	0.006161	0.09985	0.3947	0.7109	0.3856	0.2923	0.2836	0.0472	0.1341	0.9803	0.3207	0.2941	0.04472	0.3724	0.009257	0.9999	0.02722	0.2205	0.8418	0.9356	0.6253	0.5278	0.5597	0.2109
ENSMMUG00000016004	ENSG00000014257	ACP3	-0.3936	0.5232	0.1002	0.7659	0.6964	1.464	-0.2159	0.6885	0.1763	0.6267	0.1901	0.4638	0.2822	0.7292	-0.3293	0.6888	0.3119	0.1291	0.7673	0.03508	0.0892	1.785e-05	0.5617	0.03877	0.5391	0.04086	0.5081	0.1101	0.3751	0.01217	0.2668	0.01676	0.7986	0.3151	0.8773	0.1593	0.3557	0.0003502	0.9999	0.09936	0.6798	0.4798	0.8822	0.3089	0.6046	0.1119	0.4953
ENSMMUG00000000338	ENSG00000132274	TRIM22	0.4705	1.007	0.441	0.9355	1.332	1.189	-0.1812	0.564	0.3105	0.5854	0.05255	0.1825	0.372	0.4446	-0.3817	0.289	0.05629	2.823e-05	0.04718	0.0001144	3.485e-06	5.813e-07	0.431	0.01186	0.07975	0.002655	0.7639	0.3153	0.06386	0.02113	0.03041	0.1139	0.4125	0.002751	0.2183	0.005906	0.0005514	3.632e-05	0.9999	0.04295	0.1914	0.0957	0.9494	0.5601	0.2447	0.148	0.1756
ENSMMUG00000056497	NA	NA	-0.0884	0.5996	0.4825	1.214	1.255	1.135	0.1038	0.6837	-0.002499	0.1225	0.1596	0.4503	0.2651	0.4849	-0.1074	0.5362	0.8304	0.1156	0.1881	0.002141	0.005276	0.002084	0.7913	0.06084	0.9933	0.7012	0.5906	0.1365	0.4263	0.1188	0.7217	0.0756	0.981	0.3005	0.4108	0.0299	0.09828	0.009376	0.9999	0.1376	0.9958	0.9357	0.9032	0.3464	0.6503	0.3642	0.8572
ENSMMUG00000062571	ENSG00000166900	STX3	0.07401	0.5013	0.5582	1.348	1.139	1.235	-0.1173	0.8296	0.01083	0.2241	0.2021	0.5802	0.3636	0.544	-0.2657	0.5745	0.8163	0.09906	0.0597	4.144e-05	0.002222	7.248e-05	0.6955	0.006084	0.9616	0.3583	0.372	0.01688	0.1632	0.03251	0.2316	0.01841	0.9788	0.2839	0.2402	0.003482	0.05723	0.0009311	0.9999	0.02702	0.9778	0.8289	0.8502	0.1245	0.3881	0.187	0.4573
ENSMMUG00000006550	ENSG00000105939	ZC3HAV1	0.07912	0.8232	0.09918	0.4937	1.146	1.17	-0.146	0.3102	0.1682	0.8355	-0.1571	0.123	0.3917	0.6511	-0.0522	0.101	0.7266	0.0002679	0.6245	0.02348	2.384e-05	2.967e-07	0.4936	0.1316	0.3104	1.594e-05	0.3377	0.4691	0.04141	0.0007022	0.7495	0.5562	0.9664	0.01562	0.7847	0.1269	0.002217	2.394e-05	0.9999	0.2402	0.4692	0.001646	0.8413	0.6957	0.2055	0.02245	0.8735
ENSMMUG00000014873	ENSG00000143337	TOR1AIP1	0.3991	0.7285	0.379	0.7466	0.9782	1.046	-0.0242	0.6316	0.3007	0.521	0.1495	0.2135	0.3257	0.529	-0.04711	0.3568	0.03905	0.0001037	0.03001	8.692e-05	1.321e-05	5.178e-08	0.8939	0.0004467	0.0316	0.000746	0.2782	0.1354	0.03928	0.0007462	0.7319	0.01438	0.3481	0.007611	0.1874	0.005004	0.00145	7.615e-06	0.9999	0.004501	0.1059	0.03803	0.8217	0.345	0.2019	0.02343	0.8635
ENSMMUG00000012310	ENSG00000003402	CFLAR	0.459	0.8129	0.2604	0.9529	1.088	0.986	0.04176	0.4118	0.3787	0.5713	0.2233	0.4562	0.5142	0.4597	0.01414	0.3	0.07359	0.000987	0.2548	0.0001583	0.0002185	4.909e-05	0.8593	0.07391	0.03996	0.004788	0.2147	0.01735	0.01497	0.02277	0.9366	0.113	0.465	0.03798	0.4832	0.006743	0.01148	0.0007094	0.9999	0.1588	0.1221	0.1416	0.7924	0.1269	0.133	0.1546	0.9708
ENSMMUG00000042699	ENSG00000143751	SDE2	0.3601	0.6793	0.3297	0.8136	1.035	1.109	-0.09765	0.5946	0.2266	0.3816	0.1111	0.2342	0.2542	0.6	-0.136	0.3093	0.08147	0.0005821	0.07803	7.041e-05	1.164e-05	4.019e-08	0.6237	0.001764	0.1261	0.01742	0.4546	0.1265	0.1277	0.0002507	0.3656	0.04387	0.4844	0.02687	0.2698	0.004506	0.001313	6.8e-06	0.9999	0.01172	0.2574	0.3149	0.8718	0.3324	0.3398	0.01345	0.5918
ENSMMUG00000019216	ENSG00000204138	PHACTR4	0.2619	0.7316	0.5157	0.8992	0.7763	1.409	0.1658	0.8821	0.1235	0.3871	0.08097	0.4353	0.2048	0.5423	0.06074	0.4192	0.2786	0.001389	0.01888	0.0001411	0.003459	2.227e-09	0.4735	8.05e-05	0.4725	0.03615	0.6394	0.01486	0.2881	0.003034	0.7268	0.0182	0.773	0.0474	0.1651	0.006536	0.07689	1.596e-06	0.9999	0.001411	0.6228	0.4515	0.9133	0.1166	0.524	0.05105	0.8605
ENSMMUG00000005346	ENSG00000112419	PHACTR2	0.788	1.733	0.4416	0.9563	2.036	2.268	-0.4537	0.8571	0.5332	1.32	-0.3743	-0.1591	0.3913	0.9743	-0.7156	0.05378	0.1133	0.0001918	0.3555	0.05509	0.0001663	9.935e-07	0.4052	0.06469	0.1327	0.0004192	0.3264	0.6802	0.323	0.007335	0.08019	0.8837	0.5611	0.01211	0.577	0.2067	0.009648	5.07e-05	0.9999	0.1439	0.266	0.02364	0.8342	0.8374	0.5564	0.08462	0.268
ENSMMUG00000010274	ENSG00000166801	FAM111A	0.5597	0.9456	0.2569	0.4344	1.241	0.9479	-0.09631	0.156	0.4484	0.7759	0.07268	0.1057	0.2887	0.4007	-0.1985	-0.01421	0.006703	3.002e-06	0.161	0.02594	3.032e-07	1.477e-06	0.6166	0.3935	0.002763	4.657e-06	0.6173	0.4817	0.08224	0.01342	0.1748	0.9246	0.1425	0.0004515	0.3801	0.1345	6.841e-05	6.631e-05	0.9999	0.5277	0.02285	0.0005731	0.9105	0.7059	0.2753	0.1177	0.3931
ENSMMUG00000008040	ENSG00000102524	TNFSF13B	0.8868	1.949	0.6004	0.7786	2.29	1.818	-0.4324	0.669	0.6283	1.581	-0.1585	-0.1162	0.5198	0.6939	-0.8428	0.129	0.0218	3.139e-07	0.0881	0.03789	2.746e-07	8.273e-07	0.2584	0.05669	0.02207	4.696e-07	0.5662	0.6833	0.09071	0.01831	0.004104	0.6469	0.2643	5.975e-05	0.285	0.1662	6.312e-05	4.52e-05	0.9999	0.1305	0.08474	8.058e-05	0.8978	0.839	0.2885	0.1368	0.07587
ENSMMUG00000010927	ENSG00000123610	TNFAIP6	0.6851	1.18	0.4303	1.124	1.792	1.637	-0.5429	0.6836	0.2027	1.275	-0.1638	0.5338	0.1224	0.5363	-1.016	0.1463	0.2115	0.01896	0.3851	0.03049	0.003043	0.0009962	0.3252	0.1655	0.5912	0.001851	0.6699	0.1699	0.7743	0.1807	0.01294	0.7066	0.7042	0.1758	0.6024	0.1469	0.07114	0.005572	0.9999	0.284	0.7214	0.07228	0.9246	0.3939	0.8904	0.4462	0.1241
ENSMMUG00000015114	ENSG00000251201	TMED7-TICAM2	-0.077	0.3698	0.05099	0.5701	0.5302	0.8191	-0.3682	0.1779	0.0261	0.3069	-0.03163	0.07298	0.0775	0.3609	-0.2496	0.092	0.7261	0.07174	0.7972	0.007573	0.02858	6.271e-05	0.0886	0.369	0.8696	0.07283	0.8433	0.6567	0.6657	0.03345	0.1265	0.5743	0.9662	0.2523	0.8937	0.06502	0.2425	0.0008414	0.9999	0.5034	0.9217	0.6007	0.9704	0.8258	0.825	0.1889	0.3336
ENSMMUG00000023275	ENSG00000188786	MTF1	0.03586	0.2697	-0.0719	0.5523	0.5879	0.9867	-0.1368	0.532	0.1003	0.2873	0.03021	0.2558	0.275	0.5257	-0.05491	0.392	0.8497	0.1273	0.6747	0.002728	0.005019	6.18e-08	0.4547	0.002166	0.4625	0.05205	0.8267	0.07079	0.07581	0.0003628	0.6914	0.005771	0.9853	0.3129	0.8164	0.03433	0.09475	8.324e-06	0.9999	0.01338	0.6147	0.5301	0.9656	0.2468	0.265	0.01601	0.8368
ENSMMUG00000011845	ENSG00000159399	HK2	0.1732	0.2639	0.02208	1.005	0.5787	1.076	-0.1286	0.633	0.2011	0.08968	-0.07207	0.5459	0.407	0.569	-0.1071	0.5819	0.5032	0.2758	0.9245	9.021e-05	0.0435	1.351e-05	0.6014	0.007835	0.283	0.6564	0.7017	0.005701	0.05601	0.005768	0.5701	0.003325	0.9025	0.4592	0.9615	0.005112	0.2816	0.0002898	0.9999	0.03216	0.4416	0.9247	0.9327	0.07102	0.2327	0.0728	0.7551
ENSMMUG00000001217	NA	NA	0.06093	0.4088	0.3267	0.8359	0.5897	1.03	0.07571	0.4966	0.07364	0.1333	0.1689	0.3752	0.04509	0.4632	-0.2182	0.2285	0.7839	0.04984	0.1024	0.0001271	0.0161	8.546e-07	0.7223	0.01335	0.6417	0.435	0.288	0.02198	0.8017	0.006055	0.1757	0.1604	0.9771	0.2279	0.3056	0.006184	0.1888	4.566e-05	0.9999	0.04666	0.7607	0.8657	0.8245	0.1415	0.9045	0.07558	0.3943
ENSMMUG00000020803	ENSG00000177409	SAMD9L	0.6777	1.283	0.4375	1.171	1.668	1.516	-0.3485	0.8569	0.5484	0.969	0.01325	0.3102	0.3823	0.647	-0.5934	0.6102	0.06147	0.0002518	0.1766	0.0008773	5.837e-05	1.081e-05	0.2913	0.009495	0.03599	0.0007953	0.9585	0.2452	0.1921	0.02287	0.0196	0.02434	0.4265	0.01496	0.3967	0.01669	0.004588	0.0002518	0.9999	0.03669	0.1141	0.03955	0.9927	0.4872	0.4214	0.155	0.1484
ENSMMUG00000042077	ENSG00000136048	DRAM1	0.4453	0.6164	0.3582	0.9564	0.7571	0.9897	-0.175	0.4308	0.2815	0.5535	0.1412	0.5005	0.1051	0.3484	-0.4648	0.278	0.06117	0.006158	0.09534	5.039e-05	0.004445	1.097e-05	0.4496	0.04631	0.1021	0.003333	0.4129	0.005577	0.5886	0.05953	0.009486	0.1184	0.4262	0.1161	0.2953	0.003835	0.08996	0.0002538	0.9999	0.1127	0.2235	0.1107	0.8607	0.07006	0.7731	0.256	0.1089
ENSMMUG00000009112	ENSG00000136869	TLR4	0.1523	0.6977	0.4194	1.045	1.056	1.246	-0.3439	0.7704	-0.02122	0.4396	0.1138	0.3932	-0.06978	0.5024	-0.5831	0.581	0.6917	0.05577	0.2298	0.005474	0.01438	0.0005898	0.3401	0.02963	0.9382	0.1411	0.6766	0.1693	0.8211	0.09585	0.03168	0.04453	0.9598	0.2352	0.4566	0.05333	0.1771	0.003861	0.9999	0.08259	0.9642	0.7205	0.9261	0.3931	0.9133	0.3264	0.1777
ENSMMUG00000010731	ENSG00000137177	KIF13A	0.3429	0.3303	0.1972	1.043	0.7535	1.071	-0.3042	0.8245	0.2793	0.2367	0.2556	0.6923	0.3537	0.7393	-0.1282	0.823	0.2489	0.2369	0.4633	0.0003302	0.02113	0.0001017	0.2949	0.002398	0.195	0.3115	0.2395	0.002105	0.1483	0.001492	0.5606	0.0002798	0.7445	0.422	0.663	0.009555	0.2136	0.001154	0.9999	0.01439	0.3448	0.8111	0.808	0.04158	0.3684	0.03476	0.7482
ENSMMUG00000015262	ENSG00000025039	RRAGD	-0.2013	-0.04027	0.1544	0.9853	0.09941	0.6546	-0.2285	0.3808	-0.2141	-0.08642	0.1855	0.6474	0.05997	0.1211	-0.2058	0.5865	0.6032	0.9102	0.6453	0.005982	0.812	0.05168	0.5335	0.2534	0.4475	0.7763	0.5037	0.02184	0.85	0.6773	0.4702	0.03812	0.9354	0.9528	0.7987	0.05632	0.9039	0.102	0.9999	0.3854	0.6004	0.9536	0.8807	0.1414	0.9276	0.8474	0.6832
ENSMMUG00000051078	NA	NA	-0.7405	1.41	1.184	1.421	1.42	2.114	-0.7329	0.6311	0.2327	1.16	-0.07858	0.8783	0.4372	0.883	-0.2354	0.6953	0.4588	0.09943	0.1766	0.1176	0.1638	0.009694	0.447	0.4677	0.7113	0.07473	0.8971	0.1468	0.5416	0.1351	0.7177	0.2637	0.8831	0.2842	0.3967	0.3197	0.438	0.02894	0.9999	0.5973	0.8145	0.6092	0.9793	0.3613	0.741	0.3901	0.8551
ENSMMUG00000014038	ENSG00000114127	XRN1	0.7676	1.187	0.356	0.6362	1.408	1.82	-0.008725	0.866	0.4064	1.035	-0.01934	0.03314	0.3522	0.8437	-0.3168	0.3777	0.01871	0.0001178	0.2295	0.0444	9.973e-05	6.966e-09	0.9781	0.003609	0.07853	4.4e-05	0.9342	0.8907	0.1737	0.0006119	0.1846	0.1107	0.2471	0.008344	0.4563	0.1819	0.006788	2.159e-06	0.9999	0.01898	0.1896	0.003718	0.9877	0.9526	0.3995	0.0208	0.4042
ENSMMUG00000006829	ENSG00000070190	DAPP1	0.4515	0.9227	0.1613	0.4196	1.171	1.219	-0.2463	0.277	0.334	0.6059	-0.02079	-0.03242	0.1524	0.3844	-0.4929	0.1553	0.105	0.0005401	0.5197	0.1159	0.000196	4.589e-06	0.3596	0.2701	0.095	0.005586	0.9173	0.8752	0.4971	0.07587	0.01677	0.4499	0.5402	0.0257	0.7053	0.3169	0.01074	0.0001419	0.9999	0.4032	0.2137	0.1566	0.9822	0.945	0.7084	0.2892	0.1392
ENSMMUG00000001876	ENSG00000155629	PIK3AP1	0.4558	1.042	0.2219	0.384	1.291	1.297	-0.2558	0.376	0.3653	0.6804	-0.0244	-0.0185	0.233	0.5676	-0.4089	0.1137	0.05432	9.959e-06	0.2878	0.08122	4.048e-06	4.177e-08	0.236	0.07511	0.03638	0.0005075	0.8847	0.9151	0.2356	0.003603	0.01524	0.5196	0.4036	0.001226	0.5143	0.2588	0.0006165	6.873e-06	0.9999	0.1607	0.1149	0.0276	0.9762	0.9625	0.4702	0.05629	0.1339
ENSMMUG00000009439	ENSG00000109689	STIM2	0.0943	0.7878	0.2684	0.1656	0.7187	0.7562	-0.06244	0.3005	-0.03034	0.2554	-0.05888	-0.2234	-0.05236	0.1875	-0.1757	-0.1178	0.6165	1.809e-05	0.1163	0.3618	0.0006643	2.111e-05	0.7309	0.07953	0.8208	0.07685	0.6623	0.1138	0.7288	0.1911	0.1967	0.3951	0.9394	0.00195	0.3247	0.6001	0.02506	0.0003932	0.9999	0.1675	0.8903	0.6143	0.9204	0.3138	0.8626	0.4603	0.4177
ENSMMUG00000062089	ENSG00000137393	RNF144B	0.07931	0.7531	0.5696	0.9859	0.8357	1.712	0.135	1.171	0.01551	0.3668	0.01331	0.2481	0.3228	0.8206	-0.427	0.6766	0.7875	0.006198	0.03223	0.0005533	0.008517	1.521e-09	0.6385	1.602e-05	0.9412	0.1028	0.9496	0.2488	0.1694	0.0002264	0.05111	0.00173	0.9774	0.1162	0.1911	0.01299	0.1329	1.347e-06	0.9999	0.0004892	0.9663	0.6756	0.9901	0.4914	0.3951	0.01283	0.217
ENSMMUG00000020721	NA	NA	0.1391	0.5462	0.3345	0.7777	0.4683	0.696	-0.08791	0.4472	0.01889	0.09333	0.01724	0.1573	-0.08706	0.2272	-0.3559	0.2207	0.5614	0.01553	0.1213	0.0008779	0.07672	0.001479	0.7042	0.03833	0.9131	0.6147	0.921	0.377	0.6581	0.2166	0.04609	0.2144	0.9235	0.164	0.3319	0.01669	0.3433	0.007433	0.9999	0.09858	0.9489	0.9106	0.9836	0.6176	0.82	0.489	0.2091
ENSMMUG00000017972	ENSG00000010539	ZNF200	-0.233	0.4276	0.235	0.4095	0.3521	0.9188	-0.199	0.427	-0.1322	0.3015	0.08153	0.07178	0.04986	0.4493	-0.1791	0.1905	0.3531	0.06209	0.289	0.08363	0.186	4.909e-05	0.41	0.05402	0.4489	0.1018	0.6375	0.6879	0.7979	0.01345	0.3126	0.2783	0.8301	0.2409	0.5151	0.2639	0.4587	0.0007094	0.9999	0.1261	0.6018	0.6752	0.9129	0.8413	0.9029	0.1177	0.5413
ENSMMUG00000022822	ENSG00000157600	TMEM164	0.03658	0.1266	0.5035	0.6455	0.582	1.153	0.2967	0.8082	-0.1427	0.1552	0.1147	0.3123	0.1085	0.4823	-0.1798	0.3021	0.8713	0.5453	0.01313	0.002867	0.01627	4.481e-08	0.1713	8.577e-05	0.3686	0.3616	0.4656	0.05374	0.5408	0.003164	0.2616	0.05752	0.9878	0.693	0.1494	0.03555	0.19	6.91e-06	0.9999	0.001482	0.5269	0.8299	0.8747	0.2154	0.7403	0.05202	0.4902
ENSMMUG00000011584	ENSG00000171316	CHD7	0.02118	0.5	0.01438	0.158	0.3285	1.072	-0.3279	0.4425	-0.0247	0.311	-0.3095	-0.1669	0.1663	0.3808	-0.1471	0.1026	0.9216	0.01373	0.9414	0.4441	0.1563	1.913e-07	0.1169	0.0234	0.8705	0.0556	0.04632	0.2929	0.3316	0.01758	0.3395	0.5067	0.9922	0.1571	0.9705	0.6729	0.4307	1.677e-05	0.9999	0.06986	0.9225	0.548	0.7484	0.5373	0.5653	0.1334	0.5666
ENSMMUG00000008311	ENSG00000169018	FEM1B	0.1586	0.7076	0.7091	0.09326	0.44	0.8256	0.715	1.057	-0.1885	0.1908	0.09355	-0.3775	-0.4979	0.1044	-0.08592	0.1246	0.5542	0.004833	0.003267	0.719	0.1387	0.0006442	0.00551	1.73e-05	0.2884	0.3031	0.594	0.04776	0.01457	0.5739	0.6258	0.4829	0.9223	0.1029	0.09968	0.8591	0.4127	0.004077	0.4175	0.000514	0.4469	0.8104	0.9043	0.2024	0.132	0.7857	0.7947
ENSMMUG00000064953	NA	NA	-0.2074	0.1423	0.2145	0.02124	0.1079	0.4585	0.1924	0.3529	-0.184	-0.2625	-0.05476	-0.2582	-0.3167	0.01713	0.005131	-0.00171	0.2191	0.3656	0.1562	0.8948	0.5584	0.002906	0.2284	0.02078	0.127	0.0437	0.6472	0.04017	0.0209	0.894	0.9657	0.9889	0.7151	0.5397	0.3735	0.9548	0.7472	0.01188	0.9999	0.06411	0.2586	0.4926	0.9169	0.1849	0.1524	0.959	0.9844
ENSMMUG00000011675	ENSG00000158691	ZSCAN12	-0.8139	0.005114	0.6004	-0.4815	-0.3461	0.317	0.4492	0.6664	-0.5825	0.2767	-0.09655	-0.517	-0.7744	0.1849	-0.0346	0.07301	0.11	0.9902	0.1366	0.3215	0.5247	0.4253	0.2978	0.09349	0.0355	0.3074	0.7064	0.07584	0.01405	0.4889	0.8926	0.775	0.5545	0.995	0.3506	0.5637	0.7247	0.5275	0.9999	0.1872	0.1132	0.8106	0.9341	0.2554	0.1299	0.7299	0.9487
ENSMMUG00000006714	NA	NA	0.2438	0.3557	0.3632	0.3184	0.2617	0.6108	0.3069	0.5244	-0.05199	0.02767	0.1315	-0.122	-0.2199	0.1204	0.06062	0.1847	0.09244	0.009524	0.005886	0.02275	0.1002	7.138e-06	0.02726	9.501e-05	0.6105	0.8001	0.1993	0.2534	0.06026	0.2659	0.5539	0.0785	0.5104	0.1335	0.1177	0.1243	0.3684	0.0001928	0.7218	0.001585	0.7372	0.9598	0.7911	0.4967	0.2387	0.5414	0.7432
ENSMMUG00000009394	ENSG00000149212	SESN3	-0.2221	0.02546	0.3044	-0.1658	-0.5063	0.2473	0.5409	0.2962	-0.3913	-0.3125	0.2374	-0.296	-0.792	-0.2375	0.4576	-0.2081	0.4206	0.9209	0.2102	0.5285	0.1031	0.3123	0.03533	0.2276	0.04046	0.1223	0.2009	0.1331	0.0003898	0.2354	0.01408	0.2809	0.8652	0.9585	0.436	0.7357	0.3724	0.4138	0.8106	0.3572	0.1232	0.6996	0.7921	0.3421	0.02005	0.5069	0.1288
ENSMMUG00000022944	ENSG00000196323	ZBTB44	-0.1038	0.3919	0.4885	0.5517	0.03729	0.6815	0.4683	0.7445	-0.2152	-0.02815	0.2497	-0.02654	-0.4773	0.01006	0.2805	0.2211	0.6115	0.04022	0.007959	0.004996	0.8683	0.0002817	0.01569	7.566e-05	0.1335	0.8521	0.07746	0.8559	0.003817	0.9463	0.04777	0.1256	0.9376	0.214	0.129	0.0508	0.9333	0.002294	0.59	0.001348	0.2669	0.9709	0.7631	0.9364	0.06921	0.9807	0.2116
ENSMMUG00000047035	ENSG00000198162	MAN1A2	-0.1871	0.4757	0.4521	0.146	0.6409	1.22	0.178	1.174	-0.4926	0.01564	-0.2216	-0.4203	-0.2435	0.4865	-0.4697	0.09141	0.6105	0.1519	0.1598	0.6748	0.09434	0.000127	0.6106	0.0002696	0.0495	0.9513	0.3637	0.1071	0.3709	0.04825	0.06132	0.7042	0.9373	0.3364	0.3783	0.8335	0.3605	0.001318	0.9999	0.003262	0.1401	0.9904	0.8482	0.3049	0.6011	0.227	0.2371
ENSMMUG00000023775	ENSG00000154822	PLCL2	-0.1138	0.2673	0.0983	0.159	0.2099	0.5815	0.1119	0.4316	-0.08884	0.02209	0.03559	-0.133	-0.1483	0.2061	-0.03098	0.183	0.5345	0.1196	0.551	0.3636	0.2982	0.0006531	0.5211	0.01028	0.4996	0.8759	0.7866	0.329	0.319	0.1474	0.8138	0.1791	0.9147	0.3047	0.7293	0.6016	0.5564	0.004106	0.9999	0.03887	0.6464	0.9763	0.9544	0.5715	0.5524	0.4071	0.9088
ENSMMUG00000003523	ENSG00000153561	RMND5A	-0.05237	0.1463	0.2008	0.4872	0.1213	0.7263	0.06954	0.4766	-0.3905	-0.208	0.0356	-0.001469	-0.4695	0.04547	-0.03454	0.09966	0.7957	0.4369	0.2643	0.01175	0.5837	9.817e-05	0.7154	0.009	0.006743	0.1714	0.8001	0.9919	0.004108	0.7631	0.8061	0.4905	0.978	0.6032	0.4931	0.0847	0.7657	0.001128	0.9999	0.03533	0.03957	0.752	0.9586	0.9971	0.07211	0.8952	0.9047
ENSMMUG00000015182	ENSG00000266412	NCOA4	-0.117	0.211	0.4077	0.6274	0.2892	0.8023	0.1894	0.6	-0.266	-0.06387	0.1979	0.2109	-0.2644	0.2524	0.07252	0.2936	0.5916	0.3029	0.04199	0.003362	0.2302	0.000111	0.3635	0.003195	0.09511	0.7084	0.2142	0.2006	0.1415	0.144	0.6473	0.07688	0.9308	0.4832	0.212	0.03893	0.497	0.001217	0.9999	0.01752	0.2139	0.9374	0.7924	0.4343	0.3593	0.403	0.8093
ENSMMUG00000062243	NA	NA	0.01069	0.1779	0.1289	0.288	0.2679	0.5508	0.1338	0.7568	0.05816	0.1024	0.2628	0.1275	-0.07178	0.2842	0.1607	0.6751	0.9482	0.2477	0.3829	0.06887	0.1389	0.0002886	0.3933	1.057e-06	0.6225	0.4194	0.02799	0.2977	0.5902	0.02409	0.176	1.562e-07	0.994	0.4328	0.6005	0.2368	0.413	0.002325	0.9999	7.275e-05	0.7465	0.8598	0.7151	0.5413	0.7742	0.1598	0.3945
ENSMMUG00000011711	NA	NA	-0.08647	-0.04482	-0.1796	0.3349	-0.1301	0.1513	0.002553	0.234	-0.04055	-0.1573	0.1928	0.1346	-0.2032	-0.03067	0.1094	0.2506	0.6665	0.8114	0.322	0.08205	0.5567	0.4036	0.9893	0.1992	0.7788	0.3133	0.1841	0.3681	0.2151	0.8443	0.4497	0.09593	0.9537	0.889	0.5461	0.2609	0.7457	0.506	0.9999	0.3248	0.863	0.8112	0.788	0.608	0.4483	0.9359	0.6668
ENSMMUG00000020369	ENSG00000118689	FOXO3	-0.3012	-0.01582	0.1305	0.7106	0.0883	0.7319	-0.03252	0.6344	-0.2782	-0.1475	0.01666	0.2731	-0.08607	0.4604	-0.03129	0.4721	0.1426	0.9337	0.4757	0.0003882	0.6928	0.0001241	0.8664	0.00077	0.05905	0.3476	0.9089	0.07161	0.601	0.004151	0.8301	0.002201	0.6132	0.9647	0.6744	0.01047	0.8364	0.001297	0.9999	0.006648	0.1567	0.8252	0.9805	0.248	0.7823	0.05992	0.9188
ENSMMUG00000007309	ENSG00000070540	WIPI1	-0.1028	0.04567	-0.1667	0.8162	0.3458	0.4225	0.0206	0.155	-0.01852	0.05992	0.2438	0.3866	0.1473	0.1464	0.2794	0.1441	0.7527	0.8802	0.5667	0.008544	0.3353	0.1456	0.9468	0.5935	0.9361	0.8099	0.2935	0.1032	0.572	0.5511	0.2273	0.5446	0.9707	0.9337	0.7417	0.06995	0.5838	0.2284	0.9999	0.706	0.9627	0.9614	0.8264	0.2994	0.7606	0.7712	0.4524
ENSMMUG00000060557	NA	NA	-0.5221	0.1597	0.3262	0.03608	0.2097	0.2958	-0.2282	0.4327	-0.439	0.1515	-0.06576	-0.1424	-0.2963	0.1076	-0.1489	-0.2651	0.09832	0.5717	0.2306	0.9015	0.5222	0.2726	0.4437	0.1162	0.04399	0.4927	0.7522	0.5184	0.2146	0.622	0.4848	0.2162	0.5242	0.7128	0.4575	0.957	0.7232	0.3722	0.9999	0.22	0.1301	0.8832	0.9464	0.7329	0.4478	0.8154	0.6938
ENSMMUG00000064944	ENSG00000172322	CLEC12A	-0.1261	0.2506	0.3577	0.4052	0.3774	0.5771	0.232	0.3624	-0.1818	0.3538	0.05606	0.08739	0.1849	0.09402	0.21	0.01093	0.6238	0.2866	0.1176	0.09663	0.1799	0.01216	0.3414	0.1138	0.3104	0.06434	0.7521	0.6345	0.3589	0.6167	0.2373	0.9521	0.9407	0.4689	0.3269	0.2869	0.4531	0.03428	0.9999	0.2166	0.4692	0.5781	0.9464	0.8109	0.5904	0.8118	0.4636
ENSMMUG00000047033	ENSG00000131019	ULBP3	0.0579	-0.1639	0.1374	0.5346	0.1527	-0.08992	0.06028	0.06135	0.00703	-0.09514	0.2094	0.1113	0.26	-0.02435	0.3136	0.1806	0.7182	0.2786	0.3386	0.0006905	0.3836	0.5321	0.6913	0.6691	0.951	0.4435	0.06989	0.3451	0.04572	0.8426	0.007147	0.1264	0.9644	0.4618	0.5611	0.01438	0.6255	0.6283	0.9999	0.7656	0.9713	0.8659	0.7573	0.5857	0.2147	0.9359	0.09729
ENSMMUG00000000759	ENSG00000152270	PDE3B	-0.03974	0.4312	0.8589	0.814	0.2116	1.046	0.08281	1.278	-0.1821	0.4095	0.3019	0.2408	-0.2615	0.6742	-0.03423	0.666	0.8626	0.0441	5.756e-05	0.0002907	0.4006	1.205e-06	0.7074	8.337e-09	0.2669	0.01984	0.06334	0.1516	0.1618	0.0001239	0.8341	8.737e-05	0.9871	0.2206	0.02328	0.008902	0.6391	5.577e-05	0.9999	2.418e-06	0.4249	0.3395	0.7531	0.3682	0.3868	0.009931	0.921
ENSMMUG00000000541	ENSG00000143437	ARNT	-0.4314	-0.04654	0.3734	0.4328	0.03989	0.2044	0.1349	0.4607	-0.5174	-0.03695	-0.1107	0.03409	-0.07901	-0.01838	-0.04908	0.07915	0.007859	0.7559	0.0121	0.005891	0.8219	0.1644	0.3778	0.002305	2.161e-05	0.7683	0.3438	0.7777	0.5473	0.8846	0.6732	0.5178	0.1522	0.8505	0.1465	0.05594	0.9086	0.2503	0.9999	0.01401	0.0008805	0.9532	0.8435	0.8972	0.7452	0.956	0.8249
ENSMMUG00000005515	ENSG00000114770	ABCC5	-0.406	-0.2534	0.2994	0.6629	-0.2187	0.1023	0.1113	0.3536	-0.462	-0.3093	0.01266	0.2695	-0.1114	0.03134	0.03679	0.1002	0.01692	0.1053	0.04276	4.041e-05	0.2287	0.4848	0.4755	0.01713	0.0002393	0.01917	0.9149	0.02812	0.412	0.8048	0.7567	0.4081	0.234	0.2903	0.2129	0.003443	0.4956	0.5839	0.9999	0.05599	0.00471	0.3332	0.9817	0.1566	0.6363	0.9157	0.8779
ENSMMUG00000004577	ENSG00000112715	VEGFA	-0.2852	0.3179	0.6197	1.236	0.6272	0.7466	-0.2039	0.8153	-0.02889	0.2326	-0.3221	0.2227	0.2745	0.1073	-0.4723	0.1184	0.3449	0.2523	0.02378	2.477e-05	0.04792	0.005637	0.4963	0.002632	0.8917	0.306	0.1324	0.2936	0.244	0.6241	0.03421	0.5767	0.8263	0.4367	0.1749	0.002647	0.2932	0.01937	0.9999	0.01536	0.9373	0.8106	0.7837	0.538	0.4801	0.8157	0.1831
ENSMMUG00000023057	ENSG00000185436	IFNLR1	-0.3173	-0.1165	0.2043	0.5213	-0.04901	0.1727	-0.263	0.4612	-0.794	-0.3506	-0.6375	-0.1284	-0.339	-0.5125	-0.7779	-0.4463	0.2875	0.6593	0.4147	0.05041	0.8791	0.4876	0.3421	0.06356	0.0003565	0.1389	0.003475	0.5443	0.1693	0.02478	0.0005582	0.03592	0.7815	0.7801	0.6271	0.1967	0.9393	0.586	0.9999	0.1421	0.006135	0.7188	0.4964	0.752	0.3951	0.1624	0.03212
ENSMMUG00000055607	NA	NA	-1.091	-0.1962	-0.02959	0.7257	0.4138	0.245	-0.3955	0.7181	-0.6444	-0.2854	0.3086	0.754	-0.494	0.3506	0.1224	0.9584	0.06033	0.6868	0.9503	0.1604	0.5355	0.5925	0.4668	0.1194	0.0575	0.4369	0.3464	0.01892	0.1997	0.3114	0.7116	0.00393	0.4246	0.8005	0.9756	0.3803	0.7327	0.6818	0.9999	0.2242	0.1542	0.8657	0.8437	0.132	0.4298	0.5882	0.8502
ENSMMUG00000008710	ENSG00000156453	PCDH1	0.5826	-0.4391	-0.066	-0.438	0.2675	-0.2403	0.6587	0.07827	0.5181	0.1757	0.4354	0.1768	1.085	0.6363	1.046	0.4887	0.07404	0.1622	0.8247	0.1757	0.4476	0.4202	0.03612	0.792	0.03059	0.4975	0.07337	0.483	7.927e-05	0.01434	2.258e-05	0.0495	0.4652	0.3472	0.9096	0.4021	0.6727	0.5228	0.8185	0.8587	0.1036	0.885	0.7593	0.707	0.008812	0.1217	0.01196
ENSMMUG00000064708	ENSG00000180644	PRF1	0.9047	-0.3479	-0.1161	-0.2446	0.1559	-0.2685	0.7203	0.1553	0.9054	0.1766	0.5918	0.3846	1.197	0.7084	1.142	0.6822	0.0305	0.3489	0.749	0.518	0.7301	0.4601	0.06478	0.671	0.002907	0.5674	0.04281	0.196	0.0005798	0.02635	0.0002151	0.02682	0.3068	0.5255	0.8661	0.7269	0.8581	0.5611	0.9999	0.7672	0.02349	0.9018	0.7429	0.4285	0.02478	0.1674	0.02304
ENSMMUG00000011670	ENSG00000112655	PTK7	0.4092	-0.36	0.1266	-0.09869	-0.07711	-0.2764	0.7643	0.01857	0.255	0.0472	0.3125	0.01053	0.5406	0.2169	0.8981	0.09386	0.1909	0.2328	0.6506	0.7477	0.8259	0.3304	0.009772	0.9474	0.2613	0.8526	0.1766	0.965	0.04136	0.3899	0.0001027	0.6897	0.6786	0.4176	0.8019	0.8747	0.9112	0.432	0.5085	0.967	0.4192	0.971	0.7874	0.9869	0.2055	0.6583	0.01738
ENSMMUG00000005417	ENSG00000100385	IL2RB	0.7836	0.007489	0.3758	0.09078	0.3051	0.1252	0.819	0.4301	0.5921	0.1093	0.4469	0.2409	0.7463	0.5275	0.7206	0.3263	0.006898	0.9767	0.1376	0.7277	0.3295	0.6181	0.002725	0.08913	0.004963	0.6132	0.02934	0.2452	0.00182	0.0182	0.0007257	0.1241	0.1435	0.9884	0.3512	0.8642	0.5789	0.7041	0.3205	0.1807	0.03302	0.9098	0.7169	0.4872	0.04591	0.1364	0.03565
ENSMMUG00000037816	ENSG00000124570	SERPINB6	0.6959	-0.111	0.2093	-0.08037	-0.001653	-0.2844	0.7685	0.09258	0.4191	0.1813	0.4979	0.1564	0.5968	0.3848	0.819	0.1861	0.01327	0.6796	0.4141	0.7714	0.9957	0.2742	0.005049	0.7208	0.03871	0.411	0.01593	0.4652	0.009505	0.08256	7.794e-05	0.378	0.2062	0.795	0.6265	0.8899	0.998	0.3739	0.408	0.807	0.1195	0.8536	0.6824	0.6923	0.113	0.301	0.01657
ENSMMUG00000015369	ENSG00000105374	NKG7	1.193	0.008865	0.1524	-0.2243	0.6738	-0.1843	0.9209	0.05347	1.114	0.3706	0.6594	0.3231	1.273	0.5446	1.062	0.2228	0.007045	0.9819	0.6886	0.5691	0.159	0.6259	0.02468	0.8872	0.0005203	0.2574	0.03175	0.295	0.0004846	0.09765	0.0008777	0.4759	0.1445	0.9908	0.8261	0.7645	0.4331	0.7111	0.7109	0.9265	0.007904	0.7935	0.7255	0.5389	0.02261	0.3297	0.03931
ENSMMUG00000008923	ENSG00000154096	THY1	0.7347	-0.3423	0.03606	-0.07171	0.1905	-0.4271	0.5929	-0.1377	0.6322	-0.0081	0.3588	0.2197	0.7861	0.1283	0.7386	0.06455	0.008779	0.1771	0.8829	0.781	0.5296	0.08288	0.02474	0.5726	0.001877	0.9691	0.06833	0.2762	0.0006413	0.5403	0.0003057	0.7481	0.1625	0.363	0.9397	0.8959	0.7286	0.1468	0.7109	0.6885	0.01785	0.9938	0.7547	0.5222	0.02652	0.7644	0.02588
ENSMMUG00000057231	ENSG00000073861	TBX21	0.8299	-0.1281	-0.04716	-0.291	0.05032	-0.2775	0.2228	-0.2993	0.756	0.1589	0.51	0.2734	0.757	0.3512	0.7054	0.07866	0.00272	0.6043	0.8438	0.25	0.8634	0.2474	0.3781	0.2121	0.0001762	0.4388	0.00861	0.1669	0.0007012	0.08952	0.0003678	0.6891	0.08698	0.7386	0.9197	0.4912	0.9315	0.3445	0.9999	0.3398	0.00379	0.8659	0.6771	0.3895	0.02755	0.3142	0.02797
ENSMMUG00000048302	ENSG00000106351	AGFG2	0.3984	-0.3239	-0.03666	-0.1777	-0.1329	-0.2798	0.3375	-0.1995	0.3267	-0.03954	0.2894	0.111	0.3619	0.1215	0.4912	-0.008662	0.1335	0.2044	0.8788	0.4901	0.651	0.2495	0.1859	0.4127	0.09143	0.8514	0.139	0.5846	0.1	0.5618	0.01205	0.9657	0.5955	0.3892	0.9375	0.7075	0.8093	0.3467	0.9999	0.5462	0.2084	0.9709	0.7853	0.779	0.3001	0.7794	0.12
ENSMMUG00000018081	ENSG00000160185	UBASH3A	0.4234	-0.3899	-0.01897	-0.1775	-0.06071	-0.3854	0.3418	-0.01828	0.4324	-0.1144	0.3469	0.1744	0.3991	0.2351	0.5746	0.2295	0.07523	0.07833	0.9287	0.4268	0.8135	0.07098	0.1286	0.9311	0.01195	0.5295	0.04204	0.318	0.03823	0.1975	0.000952	0.1894	0.4673	0.2605	0.9642	0.6578	0.9045	0.1303	0.9999	0.9564	0.05707	0.8915	0.7429	0.5621	0.1996	0.468	0.0405
ENSMMUG00000040694	ENSG00000182866	LCK	0.2901	-0.4114	-0.1411	-0.4053	-0.2699	-0.5922	0.2284	-0.3026	0.3416	-0.04886	0.2922	0.1019	0.3244	0.1117	0.4964	0.02761	0.2031	0.05025	0.4887	0.05918	0.2781	0.004235	0.2879	0.1377	0.0387	0.7789	0.07413	0.5396	0.08036	0.5206	0.003031	0.869	0.6929	0.2285	0.6825	0.2165	0.5398	0.01563	0.9999	0.2481	0.1195	0.9538	0.7593	0.7488	0.2725	0.7516	0.06626
ENSMMUG00000015602	ENSG00000110514	MADD	0.1866	-0.4046	-0.172	-0.258	-0.2242	-0.3026	0.2164	-0.1493	0.2664	-0.07245	0.1485	0.1049	0.3605	0.2267	0.4957	0.1053	0.3297	0.02243	0.315	0.151	0.2839	0.07906	0.2333	0.3824	0.05563	0.6196	0.2753	0.4533	0.02188	0.1265	0.0005236	0.4566	0.8146	0.1854	0.5397	0.3684	0.5433	0.1414	0.9999	0.5166	0.151	0.913	0.821	0.6831	0.1558	0.3782	0.031
ENSMMUG00000022225	ENSG00000170037	CNTROB	0.3127	-0.3681	-0.06136	-0.2586	-0.3336	-0.3579	0.1537	-0.1307	0.2144	-0.1569	0.1345	-0.02013	0.2467	-0.07465	0.2683	0.05051	0.1283	0.06285	0.7416	0.1948	0.1448	0.05853	0.4351	0.4842	0.1433	0.3269	0.363	0.896	0.1396	0.638	0.0699	0.739	0.5865	0.2413	0.8614	0.4262	0.4198	0.1126	0.9999	0.6124	0.2807	0.8159	0.8481	0.9538	0.3563	0.8239	0.2507
ENSMMUG00000008899	ENSG00000139182	CLSTN3	0.334	-0.8163	-0.01697	-0.4168	-0.1809	-0.6632	0.311	0.06679	0.3439	-0.09442	0.05442	-0.1518	0.6456	0.09054	0.6062	0.5752	0.2281	0.004131	0.9472	0.1402	0.5519	0.01253	0.2463	0.7895	0.09177	0.6886	0.7953	0.4951	0.006713	0.6899	0.003484	0.006688	0.7226	0.0955	0.9737	0.3539	0.7432	0.03499	0.9999	0.8574	0.2089	0.9324	0.9578	0.7158	0.0956	0.8559	0.07004
ENSMMUG00000002494	ENSG00000248746	ACTN3	0.2981	-0.4849	-0.2854	-0.6476	-0.4152	-0.8046	0.3682	-0.7282	0.8089	-0.01395	0.3671	0.02428	0.5545	-0.01274	0.5878	-0.1657	0.3117	0.1042	0.3042	0.03512	0.2207	0.0058	0.2089	0.01278	0.0003894	0.9555	0.1123	0.9208	0.0323	0.9597	0.01008	0.4944	0.7985	0.2891	0.5286	0.1593	0.4895	0.01978	0.9999	0.04517	0.006517	0.9907	0.7756	0.9662	0.183	0.9851	0.1116
ENSMMUG00000008649	ENSG00000172543	CTSW	0.1657	-0.6508	-0.003705	-0.6569	-0.2458	-0.9292	0.6468	-0.3379	0.0545	-0.2248	0.3981	-0.08697	0.373	-0.2063	0.6827	-0.03196	0.5745	0.02186	0.9889	0.02217	0.4469	0.0008245	0.02329	0.2065	0.7972	0.33	0.06313	0.6956	0.1217	0.3713	0.001782	0.8843	0.9273	0.1839	0.9945	0.1223	0.6723	0.00485	0.6954	0.3333	0.8747	0.8182	0.7531	0.8459	0.3299	0.6425	0.05269
ENSMMUG00000010917	ENSG00000027869	SH2D2A	0.3168	-0.4895	-0.1894	-0.234	-0.1325	-0.6813	0.3069	-0.2746	0.5137	0.02325	0.2928	0.1289	0.5324	-0.05856	0.685	0.2483	0.3397	0.1279	0.5321	0.4697	0.7171	0.02898	0.3343	0.3671	0.0355	0.9307	0.2353	0.6132	0.05563	0.8263	0.005578	0.3269	0.8231	0.3133	0.7144	0.6926	0.8504	0.06549	0.9999	0.5016	0.1132	0.9862	0.8034	0.7983	0.2327	0.9295	0.08669
ENSMMUG00000050742	ENSG00000141293	SKAP1	0.3687	-0.2413	-0.1078	-0.3473	-0.1293	-0.5295	0.2826	-0.1664	0.1894	0.02754	0.1944	-0.005906	0.1482	0.02672	0.5032	0.02451	0.03894	0.1426	0.4966	0.03984	0.5023	0.001165	0.09356	0.2942	0.1382	0.8393	0.1261	0.9638	0.2998	0.8443	0.0001502	0.851	0.3478	0.3282	0.6884	0.1704	0.7098	0.006266	0.9999	0.4282	0.2738	0.9681	0.7789	0.9862	0.5356	0.9359	0.02036
ENSMMUG00000058459	NA	NA	0.471	-0.2615	-0.04918	-0.291	-0.08179	-0.6618	0.4029	-0.2884	0.1967	-0.09161	0.3021	0.1108	0.1949	-0.119	0.5339	-0.267	0.03817	0.2144	0.808	0.1746	0.7389	0.001517	0.06156	0.1563	0.2243	0.5993	0.06426	0.5082	0.2871	0.4956	0.001323	0.1138	0.3449	0.3997	0.8991	0.4005	0.8638	0.007568	0.9999	0.2727	0.3779	0.9075	0.7531	0.7246	0.523	0.736	0.04569
ENSMMUG00000063452	NA	NA	0.2829	-0.3658	-0.1162	-0.3532	-0.3101	-0.774	0.1506	-0.3402	0.1449	-0.1722	0.2897	0.132	0.1527	-0.1616	0.3396	-0.08463	0.183	0.06352	0.5421	0.07925	0.1807	8.91e-05	0.4533	0.07432	0.3412	0.2896	0.0576	0.3965	0.3706	0.3204	0.02719	0.5875	0.6705	0.2424	0.7212	0.2556	0.4541	0.001059	0.9999	0.1594	0.5002	0.8082	0.7531	0.6341	0.6008	0.5947	0.1682
ENSMMUG00000015274	NA	NA	-0.1563	-0.609	-0.2923	-0.3897	-0.5617	-0.5646	0.1051	-0.151	0.04217	-0.2695	0.04587	-0.02563	0.09013	-0.1677	0.2513	0.05101	0.4834	0.00438	0.1481	0.06844	0.02325	0.006031	0.6202	0.4526	0.7925	0.1207	0.7744	0.8771	0.6185	0.3322	0.1185	0.7579	0.8937	0.09827	0.3641	0.2359	0.222	0.02041	0.9999	0.5835	0.8718	0.6996	0.9505	0.9461	0.7936	0.6055	0.3227
ENSMMUG00000055756	NA	NA	0.06673	-0.5376	-0.176	-0.4582	-0.5477	-0.8851	0.1066	-0.2283	0.1171	-0.0898	0.259	0.08262	0.1498	-0.1153	0.3194	0.232	0.7871	0.01931	0.43	0.05121	0.04616	0.000114	0.6508	0.3059	0.5127	0.6371	0.147	0.6495	0.4534	0.5429	0.07689	0.2125	0.9773	0.1772	0.6382	0.1984	0.2876	0.001231	0.9999	0.4403	0.6576	0.9198	0.7874	0.8206	0.6743	0.7663	0.2629
ENSMMUG00000054796	ENSG00000271503	CCL5	0.8021	0.02971	0.3335	-0.04096	0.3577	-0.2251	0.7721	0.2519	0.5499	0.2884	0.6492	0.3511	0.8094	0.4537	0.8982	0.317	0.01258	0.9178	0.2385	0.8881	0.3026	0.4198	0.01066	0.369	0.0177	0.2382	0.005184	0.1317	0.002406	0.06389	0.0001688	0.1773	0.1993	0.9567	0.4656	0.9507	0.56	0.5224	0.5263	0.5034	0.07315	0.7882	0.5731	0.3395	0.05378	0.2663	0.02056
ENSMMUG00000050313	NA	NA	0.05963	-0.3977	-0.4742	-0.7606	-0.6478	-0.7612	-0.145	-0.5448	0.5364	-0.188	0.4982	0.2214	0.2249	0.1536	0.2931	0.152	0.821	0.1246	0.05128	0.004303	0.03216	0.002409	0.5721	0.02758	0.00527	0.3684	0.01065	0.2728	0.3023	0.4598	0.1274	0.443	0.9792	0.3096	0.2252	0.04549	0.2541	0.01042	0.9999	0.07827	0.03409	0.8324	0.6824	0.5179	0.5376	0.7084	0.3352
ENSMMUG00000063583	NA	NA	1.138	0.08198	0.2231	0.1777	0.5919	-0.1723	0.73	-0.2068	0.9894	0.4781	0.7066	0.5145	1.17	0.5995	0.9606	0.08417	0.002594	0.8093	0.4972	0.6043	0.145	0.5986	0.0375	0.5255	0.000377	0.09817	0.009303	0.06361	0.000208	0.03878	0.0005281	0.7589	0.0845	0.8875	0.6887	0.7892	0.4198	0.6869	0.8298	0.6489	0.006406	0.6632	0.6809	0.235	0.01448	0.2027	0.031
ENSMMUG00000019294	ENSG00000092009	CMA1	0.7772	-0.2441	0.06724	-0.1267	0.1271	-0.3923	0.5275	-0.1494	0.8078	0.3463	0.6999	0.4568	0.9222	0.6015	0.9781	0.3377	0.03072	0.4731	0.8352	0.7138	0.7455	0.2303	0.1246	0.6468	0.002052	0.2168	0.008004	0.09173	0.001836	0.03277	0.0002261	0.2095	0.3073	0.6332	0.9151	0.855	0.8676	0.3254	0.9999	0.7478	0.01901	0.7757	0.6769	0.2807	0.04612	0.1878	0.0236
ENSMMUG00000014381	ENSG00000100453	GZMB	1.19	0.1292	0.5082	0.2061	0.773	0.1046	1.012	0.4409	0.9139	0.7271	0.7714	0.532	1.127	0.7786	1.011	0.5234	0.0009095	0.6883	0.1051	0.528	0.04496	0.7365	0.002644	0.1586	0.0004322	0.008082	0.002616	0.04111	0.0001372	0.004676	0.0001104	0.04491	0.0445	0.8014	0.31	0.7356	0.2851	0.8021	0.3158	0.2753	0.00703	0.1969	0.4964	0.1874	0.01211	0.06481	0.01801
ENSMMUG00000015099	ENSG00000152969	JAKMIP1	0.6996	-0.09416	0.4118	-0.03152	0.3835	-0.01855	0.6352	0.3495	0.533	0.1189	0.3412	0.01757	0.6115	0.3444	0.7098	0.2488	0.002034	0.6596	0.04571	0.8873	0.1212	0.9278	0.004087	0.08979	0.001215	0.5054	0.03839	0.919	0.001261	0.04958	2.633e-05	0.1387	0.07353	0.7803	0.2161	0.9505	0.3907	0.9477	0.3809	0.1816	0.01341	0.8869	0.7429	0.9653	0.03765	0.2304	0.0122
ENSMMUG00000043342	ENSG00000167613	LAIR1	0.2321	-0.1887	-0.04632	-0.3192	-0.1954	-0.4862	0.00604	-0.2826	0.09888	-0.02252	0.1344	-0.05926	0.2315	-0.09104	0.377	-0.04134	0.1561	0.2147	0.7538	0.04191	0.2737	0.001292	0.9689	0.05711	0.4007	0.8588	0.2527	0.6246	0.08417	0.4691	0.001752	0.7327	0.6353	0.4	0.8694	0.1755	0.5356	0.006761	0.9999	0.1312	0.5572	0.973	0.8124	0.8052	0.2786	0.7152	0.05225
ENSMMUG00000008854	ENSG00000204475	NCR3	0.7704	-0.03306	0.1227	-0.08631	0.495	-0.4747	0.7716	-0.1363	0.3892	0.1927	0.3241	0.03966	0.7983	0.03192	0.6534	-0.1592	0.01396	0.9121	0.668	0.7829	0.1412	0.1085	0.01108	0.643	0.05909	0.392	0.1244	0.8571	0.0006599	0.8896	0.001763	0.4663	0.2118	0.9537	0.8128	0.8969	0.4157	0.1815	0.5308	0.7449	0.1567	0.8412	0.7789	0.9365	0.0266	0.9577	0.05239
ENSMMUG00000065286	ENSG00000168329	CX3CR1	1.657	0.8298	0.4979	0.221	0.8808	0.7691	0.6872	0.7713	1.377	0.8497	0.8523	0.5177	1.19	1.234	1.027	0.7811	8.875e-06	0.01112	0.1077	0.4871	0.024	0.01477	0.03572	0.01407	4.528e-07	0.002329	0.0008368	0.04278	7.559e-05	1.748e-05	8.446e-05	0.003149	0.00256	0.1434	0.3135	0.7054	0.2256	0.03928	0.8153	0.04842	5.484e-05	0.08654	0.3628	0.1911	0.008688	0.004346	0.01657
ENSMMUG00000012933	ENSG00000157483	MYO1E	0.5808	-0.2613	-0.5007	-0.257	-0.06765	-0.3192	0.02584	-0.165	0.7034	0.0852	0.2284	0.2034	0.7377	0.501	0.6438	0.3801	0.01367	0.2406	0.02045	0.2545	0.7923	0.1321	0.9076	0.4361	4.734e-05	0.6332	0.1727	0.2382	0.0001401	0.005755	0.0001748	0.02805	0.21	0.425	0.1694	0.4962	0.8939	0.2114	0.9999	0.5687	0.001546	0.9192	0.7874	0.4791	0.01211	0.0728	0.02109
ENSMMUG00000022914	NA	NA	0.4674	-0.04945	-0.0199	0.06635	-0.3239	-0.527	-0.1082	-0.292	0.4035	-0.09057	0.3032	0.1703	-0.03417	-0.2214	0.0764	0.01663	0.008043	0.7671	0.8996	0.6938	0.1023	0.001587	0.5253	0.071	0.001726	0.5106	0.01922	0.2004	0.8141	0.1167	0.5526	0.9	0.1543	0.8581	0.9485	0.8442	0.3716	0.007799	0.9999	0.1544	0.0169	0.8877	0.6824	0.4341	0.9105	0.3608	0.7426
ENSMMUG00000014106	ENSG00000188130	MAPK12	0.2782	-0.5262	-0.5925	-0.4549	-1.028	-1.376	-0.4645	-1.149	0.5276	-0.4187	-0.001457	0.154	-0.2954	-0.6258	-0.06975	-0.03214	0.3732	0.1027	0.04572	0.1456	0.01043	3.033e-05	0.1467	0.0002216	0.02023	0.1151	0.9952	0.529	0.3016	0.02417	0.7712	0.8982	0.844	0.2873	0.2161	0.3612	0.152	0.0004999	0.9999	0.002884	0.08012	0.6928	0.9988	0.7413	0.5373	0.16	0.8862
ENSMMUG00000018318	ENSG00000142733	MAP3K6	-0.1835	-0.3359	-0.5925	-0.6082	-0.5313	-0.8508	-0.1332	-0.5366	-0.2246	-0.4259	-0.1868	-0.6181	-0.07123	-0.822	-0.198	-0.5695	0.5676	0.2775	0.04214	0.05718	0.1294	0.005623	0.6575	0.06892	0.3075	0.08772	0.4108	0.01156	0.7847	0.001328	0.3731	0.0162	0.9258	0.4608	0.2121	0.2115	0.402	0.01934	0.9999	0.151	0.4662	0.6415	0.8607	0.1043	0.8958	0.03255	0.5987
ENSMMUG00000022161	ENSG00000063180	CA11	0.1993	-0.4519	-0.409	-0.3973	-0.8357	-0.9153	-0.2749	-0.7239	0.4384	-0.1869	0.1683	0.1438	-0.02823	-0.3624	0.1843	-0.03812	0.4169	0.06255	0.07197	0.1004	0.003794	0.0001585	0.2546	0.002101	0.01632	0.349	0.3637	0.4545	0.8934	0.0781	0.3174	0.8417	0.8625	0.241	0.2606	0.2929	0.08123	0.001556	0.9999	0.01314	0.06974	0.8258	0.8482	0.6839	0.9476	0.2933	0.5456
ENSMMUG00000020459	ENSG00000164896	FASTK	0.07287	-0.4325	-0.2098	-0.3927	-0.7051	-0.8971	-0.1001	-0.5289	0.1713	-0.2546	0.05659	-0.1007	-0.1044	-0.5289	0.001317	-0.1976	0.8068	0.1275	0.4363	0.1727	0.0353	0.001461	0.725	0.05363	0.4346	0.2878	0.7977	0.662	0.6779	0.03164	0.9952	0.3886	0.9784	0.313	0.642	0.3977	0.2612	0.007389	0.9999	0.1253	0.5884	0.8082	0.9585	0.8292	0.832	0.1833	0.9974
ENSMMUG00000021096	ENSG00000141577	CEP131	-0.1574	-0.5916	-0.3131	-0.5208	-0.8206	-0.7528	0.01012	-0.473	0.1973	-0.3949	0.09534	-0.0629	-0.00861	-0.2729	0.301	0.1947	0.7023	0.1459	0.4027	0.1995	0.0804	0.05168	0.9794	0.2064	0.5094	0.2398	0.7548	0.8447	0.9803	0.4177	0.3167	0.5296	0.9619	0.3313	0.6173	0.4319	0.3482	0.102	0.9999	0.3333	0.6543	0.7895	0.9466	0.9314	0.991	0.6812	0.545
ENSMMUG00000007257	ENSG00000159164	SV2A	-0.5431	-0.4795	-0.1352	-0.4883	-0.4838	-0.3118	0.186	-0.02318	-0.2844	-0.4137	-0.04668	-0.2245	-0.04616	-0.1682	0.2778	-0.3541	0.04849	0.06698	0.5648	0.06063	0.09613	0.1908	0.4442	0.9223	0.1432	0.04872	0.8063	0.2766	0.8292	0.4072	0.1354	0.07198	0.3873	0.2466	0.7403	0.2196	0.3629	0.2808	0.9999	0.9504	0.2806	0.5149	0.9598	0.5228	0.9178	0.6732	0.3454
ENSMMUG00000012859	NA	NA	0.505	-0.2512	-0.04413	-0.141	-0.6489	-0.4023	0.1175	-0.2994	0.241	-0.08659	-0.06459	0.003808	0.02717	-0.04326	-0.01317	0.02416	0.04025	0.2935	0.844	0.5586	0.01931	0.07846	0.6179	0.1863	0.176	0.661	0.7272	0.9842	0.8964	0.8267	0.9428	0.8986	0.3538	0.4757	0.9197	0.7586	0.2065	0.1405	0.9999	0.3097	0.3216	0.9258	0.9419	0.995	0.9487	0.9296	0.9734
ENSMMUG00000012940	ENSG00000149743	TRPT1	0.1367	-0.4123	-0.2097	-0.3739	-0.5048	-0.959	-0.3433	-0.6037	0.1093	-0.3738	-0.02854	-0.2436	-0.02671	-0.5659	-0.0459	-0.3119	0.5789	0.09004	0.3535	0.1261	0.07174	9.184e-05	0.1593	0.009936	0.5512	0.06992	0.8791	0.2212	0.8994	0.008111	0.8072	0.114	0.9283	0.2746	0.5753	0.3332	0.3343	0.001082	0.9999	0.03797	0.6903	0.5958	0.9748	0.4585	0.9505	0.08995	0.9055
ENSMMUG00000009517	ENSG00000100445	SDR39U1	0.1664	-0.3703	-0.1938	-0.3542	-0.4528	-0.8079	-0.03222	-0.4954	0.1545	-0.2004	-0.005455	-0.04545	0.07856	-0.2942	0.1054	-0.2293	0.3881	0.04632	0.2699	0.06038	0.03739	1.67e-05	0.862	0.006054	0.2711	0.1925	0.9694	0.7584	0.6243	0.06003	0.4567	0.121	0.8536	0.2245	0.4978	0.2188	0.2661	0.0003319	0.9999	0.02694	0.4294	0.7682	0.9941	0.8847	0.798	0.2572	0.6729
ENSMMUG00000023675	ENSG00000178922	HYI	0.3255	-0.4806	-0.3441	-0.5246	-0.6202	-0.9284	-0.1035	-0.6852	0.3615	-0.212	0.254	0.04102	0.1121	-0.3331	0.261	-0.1554	0.1945	0.04629	0.131	0.03242	0.02836	0.00012	0.6664	0.003534	0.04973	0.2894	0.1706	0.8307	0.591	0.1014	0.1571	0.4192	0.6817	0.2245	0.3434	0.1522	0.2422	0.00127	0.9999	0.01866	0.1403	0.8082	0.7874	0.925	0.7748	0.3365	0.3713
ENSMMUG00000007723	ENSG00000166313	APBB1	-0.04464	-0.5561	-0.2704	-0.4636	-0.5871	-0.7939	0.04355	-0.5159	0.009287	-0.3527	0.07543	-0.01637	0.02484	-0.1975	0.3325	-0.1163	0.8433	0.01075	0.1865	0.03393	0.0204	0.0002002	0.8395	0.01318	0.9545	0.04847	0.6446	0.9231	0.8928	0.2666	0.04368	0.4912	0.9841	0.1408	0.409	0.1559	0.2099	0.001813	0.9999	0.04623	0.9733	0.5144	0.9162	0.9672	0.9474	0.5419	0.2037
ENSMMUG00000018895	ENSG00000102312	PORCN	0.02621	-0.3777	-0.08835	-0.3089	-0.3436	-0.4771	0.2392	-0.4434	0.02347	-0.2221	0.1397	-0.06986	0.07725	-0.1842	0.2433	-0.2987	0.9041	0.07558	0.6535	0.1484	0.1592	0.01946	0.2525	0.03007	0.8815	0.2011	0.3812	0.6756	0.6676	0.2879	0.1245	0.07572	0.9898	0.2561	0.8037	0.3647	0.4331	0.04841	0.9999	0.08335	0.9299	0.7708	0.854	0.8356	0.8261	0.5635	0.3304
ENSMMUG00000002496	ENSG00000174080	CTSF	0.1446	-0.2231	-0.01877	-0.2312	-0.5901	-0.6223	0.1626	-0.2209	0.07591	-0.2586	0.1595	-0.008017	0.04234	-0.1377	0.1927	-0.08195	0.4849	0.2612	0.9194	0.2523	0.01307	0.001453	0.4112	0.2411	0.6095	0.113	0.288	0.9592	0.8034	0.4008	0.1976	0.5976	0.8941	0.4446	0.9588	0.4937	0.1703	0.00736	0.9999	0.3715	0.7362	0.6887	0.8245	0.9841	0.9055	0.6676	0.4185
ENSMMUG00000019039	ENSG00000006025	OSBPL7	0.2586	-0.6042	-0.2639	-0.4254	-0.6638	-0.9546	0.1705	-0.6178	0.4454	-0.2598	0.3162	0.1873	0.3022	-0.2694	0.6252	-0.07909	0.4247	0.05703	0.3721	0.18	0.07077	0.002209	0.5824	0.04182	0.06324	0.3254	0.1925	0.4564	0.2709	0.3095	0.009829	0.7528	0.868	0.2362	0.591	0.4089	0.3329	0.009793	0.9999	0.1049	0.164	0.8152	0.7911	0.6854	0.507	0.5865	0.1103
ENSMMUG00000021486	ENSG00000141295	SCRN2	0.06609	-0.461	-0.1865	-0.3732	-0.5409	-0.7287	-0.02668	-0.3763	0.2175	-0.1771	0.09322	-0.002351	0.1076	-0.2361	0.2242	-0.0547	0.7388	0.01491	0.299	0.05091	0.01472	0.0001038	0.8877	0.03808	0.1309	0.253	0.5151	0.9873	0.5053	0.1285	0.1197	0.7112	0.9682	0.1613	0.5232	0.1978	0.1797	0.001168	0.9999	0.09808	0.2638	0.7925	0.884	0.9961	0.7134	0.3807	0.3242
ENSMMUG00000007802	ENSG00000102901	CENPT	0.1368	-0.3757	-0.2044	-0.358	-0.7252	-0.8002	-0.2024	-0.6259	0.1853	-0.2707	0.2482	0.01186	-0.09032	-0.293	0.1964	-0.07213	0.5927	0.1276	0.3756	0.1538	0.01379	0.001072	0.4091	0.008971	0.3161	0.188	0.1856	0.9515	0.6776	0.1512	0.294	0.7119	0.9308	0.3131	0.594	0.3719	0.1739	0.005896	0.9999	0.03524	0.4753	0.7653	0.7888	0.9801	0.832	0.4125	0.5218
ENSMMUG00000048888	NA	NA	0.04455	-0.4379	-0.122	-0.3028	-0.3943	-0.6815	0.0123	-0.3943	0.1688	-0.2806	0.09155	-0.03482	0.04095	-0.3049	0.2328	-0.147	0.8224	0.02037	0.4962	0.1125	0.07349	0.0002605	0.948	0.03028	0.2417	0.07185	0.5235	0.8141	0.8003	0.05112	0.1067	0.3227	0.9792	0.1799	0.6881	0.3122	0.3385	0.002172	0.9999	0.08371	0.3971	0.5998	0.8843	0.9166	0.9039	0.2343	0.3066
ENSMMUG00000007494	ENSG00000033011	ALG1	0.08176	-0.2772	-0.1569	-0.3227	-0.2415	-0.649	-0.0004504	-0.6862	0.2755	-0.08595	0.1641	0.05285	0.2561	-0.1686	0.1625	-0.2072	0.641	0.09921	0.3249	0.05777	0.2086	0.0001081	0.9979	4.845e-05	0.03562	0.5455	0.2134	0.6982	0.0862	0.2365	0.2163	0.1323	0.948	0.284	0.5485	0.2131	0.4804	0.001196	0.9999	0.001006	0.1135	0.8968	0.7924	0.8476	0.2825	0.508	0.4395
ENSMMUG00000022123	ENSG00000182173	TSEN54	0.3523	-0.2959	0.1652	-0.2048	-0.07082	-0.5116	0.2349	-0.3788	0.2498	-0.08309	0.269	-0.01852	0.2908	-0.1265	0.3837	-0.2588	0.08207	0.1196	0.3634	0.2895	0.7483	0.006071	0.2222	0.04029	0.08756	0.5963	0.06594	0.9022	0.0784	0.421	0.009498	0.08838	0.4856	0.3047	0.5828	0.5323	0.8697	0.02049	0.9999	0.1019	0.2028	0.9062	0.7531	0.9565	0.269	0.6836	0.109
ENSMMUG00000007728	ENSG00000110171	TRIM3	-0.01997	-0.3662	-0.02261	-0.2438	-0.1873	-0.5881	0.1521	-0.4343	-0.09296	-0.2506	0.1011	-0.1887	0.08218	-0.3732	0.2506	-0.2762	0.9149	0.04123	0.8926	0.1775	0.3622	0.0008526	0.3911	0.01215	0.4922	0.09045	0.4562	0.1857	0.5904	0.01343	0.06471	0.05307	0.9908	0.2148	0.9458	0.4046	0.6055	0.004957	0.9999	0.04357	0.6398	0.6432	0.8719	0.4161	0.7744	0.1177	0.2417
ENSMMUG00000007013	ENSG00000114388	NPRL2	0.2418	-0.4294	-0.2559	-0.3382	-0.3735	-0.7802	-0.03075	-0.5647	0.1778	-0.1462	0.168	-0.0002637	0.248	-0.1802	0.3362	-0.1632	0.2091	0.02023	0.1423	0.06949	0.07928	2.532e-05	0.8666	0.001729	0.202	0.3343	0.2309	0.9986	0.1171	0.237	0.01716	0.2621	0.7012	0.1796	0.3569	0.238	0.3466	0.0004451	0.9999	0.01159	0.3522	0.8209	0.8001	0.9995	0.3243	0.5085	0.1411
ENSMMUG00000001347	ENSG00000161395	PGAP3	0.1278	-0.4227	-0.2792	-0.3912	-0.3985	-0.7591	0.0532	-0.6259	0.2999	-0.1947	0.161	0.07303	0.1947	-0.2166	0.2625	-0.2558	0.5748	0.05521	0.1796	0.07853	0.1168	0.0004934	0.8079	0.003669	0.0729	0.2843	0.3377	0.675	0.3029	0.237	0.1168	0.1447	0.9273	0.2341	0.4005	0.2543	0.3864	0.003404	0.9999	0.0192	0.1805	0.8072	0.8413	0.8354	0.5379	0.5085	0.3202
ENSMMUG00000006407	ENSG00000167925	GHDC	0.3216	-0.3478	-0.1325	-0.3526	-0.352	-0.7058	0.008524	-0.5335	0.4333	-0.1117	0.1722	0.04188	0.2232	-0.3078	0.2099	-0.165	0.2456	0.1906	0.5981	0.1931	0.2549	0.007085	0.9745	0.03883	0.03343	0.6122	0.3996	0.8436	0.3339	0.1693	0.3032	0.4372	0.7412	0.3764	0.765	0.4245	0.5184	0.02296	0.9999	0.09945	0.1096	0.9098	0.8583	0.931	0.5676	0.4325	0.5311
ENSMMUG00000014101	ENSG00000100429	HDAC10	0.2017	-0.5793	-0.228	-0.4252	-0.5551	-0.9139	-0.02815	-0.7523	0.4292	-0.3303	0.1382	-0.0235	0.1787	-0.5369	0.1909	-0.2555	0.5849	0.1056	0.4971	0.2375	0.179	0.009405	0.9369	0.02976	0.1129	0.2681	0.6125	0.9339	0.5635	0.07709	0.482	0.3705	0.9289	0.2905	0.6887	0.4777	0.453	0.02833	0.9999	0.08282	0.2388	0.8008	0.9096	0.9719	0.7549	0.2916	0.692
ENSMMUG00000005452	ENSG00000145020	AMT	-0.0003729	-0.5613	-0.4377	-0.6257	-0.9367	-0.8628	-0.3805	-0.8529	0.2262	-0.3702	0.09333	-0.06094	-0.2246	-0.3149	0.06903	-0.2481	0.9987	0.01035	0.03239	0.00486	0.00039	6.317e-05	0.08032	7.345e-05	0.1649	0.04031	0.571	0.7226	0.2343	0.0807	0.6746	0.1494	0.9995	0.1384	0.1916	0.04992	0.01728	0.0008448	0.9999	0.001328	0.3085	0.4787	0.8982	0.8625	0.4689	0.2987	0.826
ENSMMUG00000002719	ENSG00000005448	WDR54	0.07187	-0.5392	-0.3074	-0.5332	-0.531	-0.8947	-0.05565	-0.8831	0.2095	-0.2101	0.08801	-0.1143	0.07778	-0.3865	0.3146	-0.4156	0.7436	0.01223	0.1265	0.015	0.03223	3.255e-05	0.7916	4.182e-05	0.1987	0.2428	0.5944	0.5097	0.6769	0.03603	0.05596	0.01917	0.9692	0.1502	0.3376	0.09799	0.2543	0.0005232	0.9999	0.0009098	0.3489	0.7895	0.9043	0.7259	0.8317	0.1951	0.2262
ENSMMUG00000017610	NA	NA	-0.08328	-0.6017	-0.6393	-0.6835	-0.5234	-0.9061	-0.1121	-0.9519	0.1457	-0.177	-0.004775	0.06625	0.04752	-0.2911	0.3265	-0.4784	0.6799	0.002408	0.0007357	0.0006974	0.02193	4.472e-06	0.559	1.98e-06	0.3177	0.2681	0.9743	0.6665	0.7747	0.07255	0.02686	0.00268	0.9571	0.07035	0.05626	0.0144	0.2173	0.0001411	0.9999	0.0001134	0.477	0.8008	0.996	0.8309	0.8904	0.2845	0.1681
ENSMMUG00000018265	ENSG00000135362	PRR5L	0.3948	-0.08351	-0.07893	-0.4743	0.117	0.1686	0.4703	0.01197	0.3224	0.04618	0.2181	-0.05365	0.5819	0.3376	0.6897	0.04442	0.09255	0.7053	0.7107	0.04078	0.6469	0.426	0.03753	0.9551	0.05741	0.8003	0.2017	0.7632	0.002721	0.06407	8.27e-05	0.7995	0.5104	0.8137	0.8414	0.1725	0.8061	0.5282	0.8298	0.9725	0.154	0.9598	0.7924	0.888	0.05755	0.2664	0.01657
ENSMMUG00000002413	ENSG00000130300	PLVAP	0.5699	-0.1683	-0.4156	-0.6163	-0.2628	-0.6556	0.4297	0.1874	1.043	0.185	0.5481	0.3307	0.9108	0.2698	0.8093	0.9191	0.222	0.7102	0.3355	0.1974	0.6211	0.1347	0.3402	0.6567	0.002166	0.6177	0.1168	0.3634	0.01744	0.4672	0.01796	0.008756	0.7178	0.8173	0.5589	0.4295	0.7904	0.2147	0.9999	0.7553	0.01967	0.912	0.7756	0.6043	0.1414	0.714	0.143
ENSMMUG00000062613	NA	NA	-0.8085	-0.6865	0.3671	-1.044	-0.3207	-0.732	1.305	-0.01617	-0.913	-0.0005191	0.2146	-0.3508	-0.1428	-0.6169	0.4262	-0.4981	0.224	0.2523	0.4926	0.09227	0.6289	0.2079	0.01616	0.9771	0.03286	0.999	0.5703	0.4146	0.7378	0.1488	0.2341	0.2289	0.7195	0.4367	0.6856	0.2801	0.7949	0.3005	0.6039	0.986	0.1084	0.9997	0.8982	0.6501	0.8675	0.4087	0.4596
ENSMMUG00000017929	ENSG00000123992	DNPEP	0.7629	0.3679	-0.4146	-0.2828	0.3743	-0.09702	-0.09857	-0.4811	0.9099	0.6306	0.04987	0.02937	0.6512	0.07854	0.1248	-0.03833	0.002219	0.1048	0.06007	0.2225	0.1591	0.6565	0.6693	0.02986	1.164e-06	0.001095	0.7761	0.871	0.001302	0.675	0.4748	0.8323	0.07626	0.2896	0.2407	0.4607	0.4331	0.7368	0.9999	0.08292	9.907e-05	0.04972	0.9512	0.9435	0.03847	0.8459	0.6864
ENSMMUG00000004392	ENSG00000179218	CALR	0.3791	-0.2518	-0.618	-0.5405	-0.08746	-0.6476	-0.06142	-0.8035	0.542	-0.02588	0.1345	0.02543	0.5844	0.01833	0.4392	-0.1173	0.08458	0.2141	0.00209	0.009661	0.7145	0.00128	0.7659	7.847e-05	0.0008405	0.8776	0.3877	0.874	0.00138	0.9128	0.006045	0.4649	0.4919	0.3993	0.0888	0.07516	0.8491	0.006713	0.9999	0.001388	0.0107	0.9766	0.8562	0.945	0.03984	0.9668	0.08992
ENSMMUG00000011367	ENSG00000071462	BUD23	0.4555	0.0982	-0.2505	-0.05514	0.2708	-0.1132	-0.01859	-0.4569	0.4935	0.09516	0.2279	0.07869	0.4605	0.02619	0.3021	-0.1221	0.01771	0.5778	0.1435	0.7588	0.1923	0.507	0.9175	0.008585	0.000473	0.5164	0.09664	0.5757	0.00341	0.8579	0.02849	0.3863	0.2403	0.717	0.3588	0.8814	0.4653	0.6051	0.9999	0.03415	0.007429	0.8881	0.7707	0.7741	0.06471	0.9444	0.1707
ENSMMUG00000001635	ENSG00000183779	ZNF703	0.04238	-0.02151	-0.7362	-0.4358	-0.4687	-0.2786	-0.3006	-0.6542	0.5383	0.1026	0.1072	0.2224	0.3254	0.06878	0.1288	-0.01887	0.8869	0.9396	0.008576	0.1357	0.1614	0.3071	0.3002	0.01906	0.01597	0.6695	0.6361	0.3395	0.2009	0.7746	0.5658	0.9353	0.9887	0.968	0.1333	0.3475	0.4348	0.4088	0.9999	0.0603	0.06882	0.9278	0.9126	0.5811	0.4314	0.9006	0.752
ENSMMUG00000014153	ENSG00000104856	RELB	-0.08494	-0.4317	-0.6464	-0.8477	-0.5625	-0.7668	-0.2409	-0.9963	0.402	-0.1603	0.0644	-0.1386	0.07073	-0.3034	0.161	-0.08714	0.7711	0.1219	0.01636	0.003728	0.08569	0.005035	0.387	0.0003291	0.058	0.4871	0.7636	0.5368	0.7694	0.1933	0.4494	0.6948	0.9752	0.3067	0.1563	0.04148	0.3521	0.01781	0.9999	0.003675	0.1549	0.8809	0.9494	0.7464	0.887	0.463	0.6667
[truncated: 1 more columns]
